# Supplementary material for: Steroidal Pyrimidines and Dihydrotriazines as Novel Classes of Anticancer Agents against Hormone-Dependent Breast Cancer Cells
Source: PubMed Central journal article supplement (PMC5767602; doi:10.3389/fphar.2017.00979), 2018-01-10
Supplement: SupplementaryMaterial.pdf [file SupplementaryMaterial.pdf]

**STEROIDAL PYRIMIDINES AND DIHYDROTRIAZINES AS NOVEL CLASSES OF  
ANTICANCER AGENTS AGAINST HORMONE-DEPENDENT BREAST CANCER  
CELLS**

Alexander M. Scherbakov<sup>1\*</sup>, Alexander V. Komkov<sup>2</sup>, Anna S. Komendantova<sup>2</sup>, Margarita A. Yastrebova<sup>1</sup>, Olga E. Andreeva<sup>1</sup>, Valerii Z. Shirinian<sup>2</sup>, Alakananda Hajra,<sup>3</sup> Igor V. Zavarzin<sup>2</sup>, Yulia A. Volkova<sup>2\*</sup>

<sup>1</sup>*Department of Experimental Tumor Biology, N.N. Blokhin National Medical Research Center of Oncology, Kashirskoye shosse 24, 115478, Moscow, Russia*

<sup>2</sup>*N.D. Zelinsky Institute of Organic Chemistry, Russian Academy of Sciences, Leninsky prosp. 47, 119991 Moscow, Russia*

<sup>3</sup>*Department of Chemistry, Visva-Bharati (A Central University), Santiniketan, India*

<sup>1</sup>H NMR (DMSO-d<sub>6</sub>, 600 MHz) spectrum of  
**3-hydroxy-2'-methyl-Δ<sup>1,3,5(10)</sup>-estratrieno[17,16-d]pyrimidine (3a)**

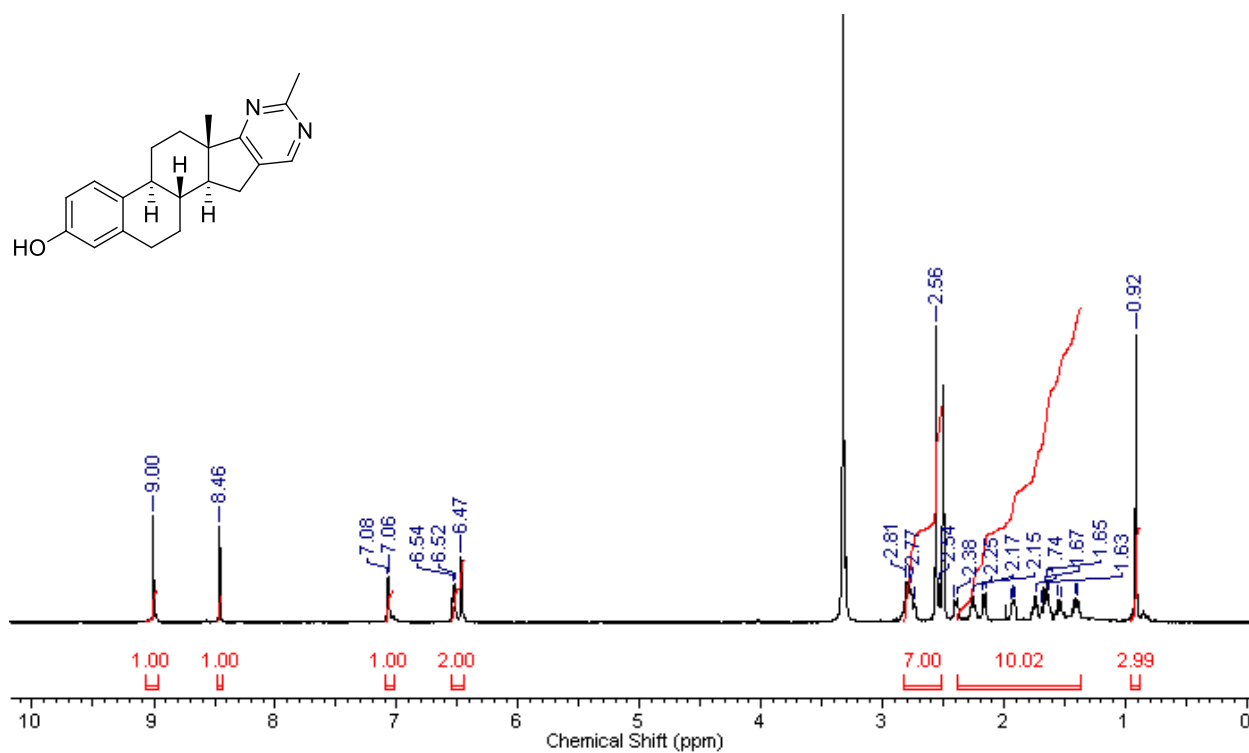

<sup>13</sup>C NMR (DMSO-d<sub>6</sub>, 150 MHz) spectrum of  
**3-hydroxy-2'-methyl-Δ<sup>1,3,5(10)</sup>-estratrieno[17,16-d]pyrimidine (3a)**

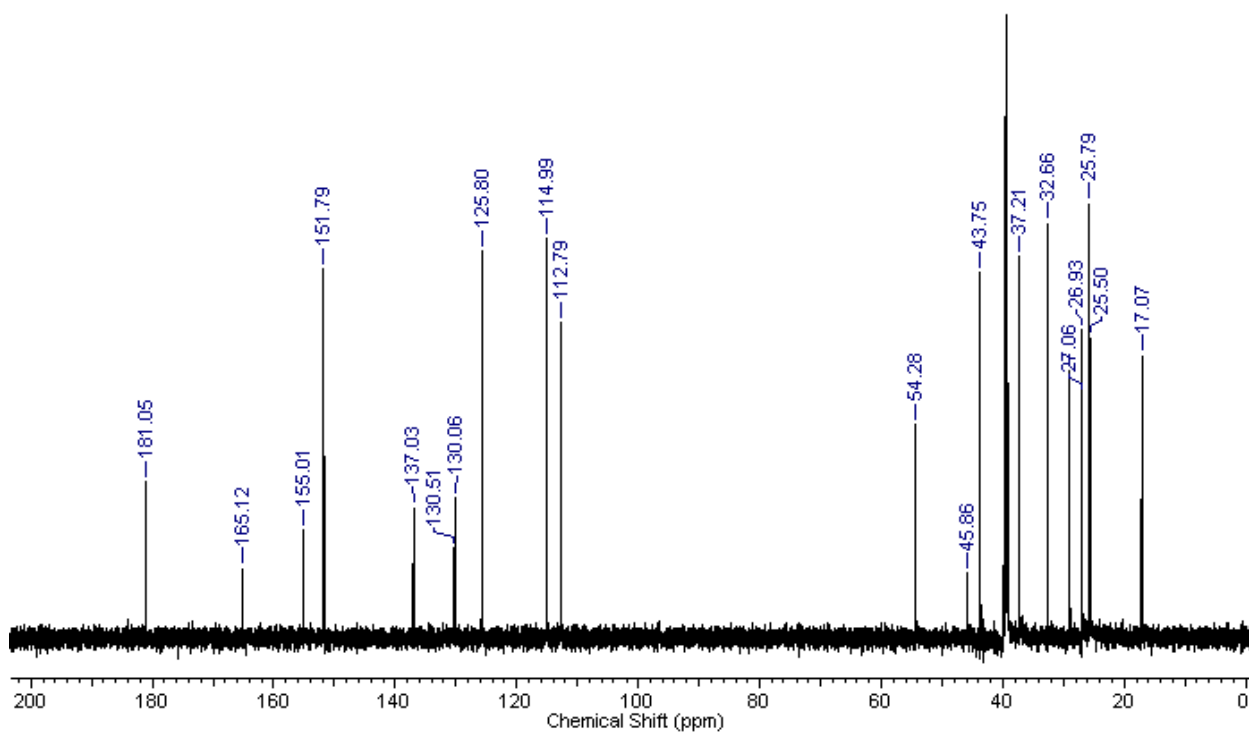

$^1\text{H}$ - $^{13}\text{C}$  HSQC NMR (DMSO- $d_6$ ) spectrum of  
3-hydroxy-2'-methyl- $\Delta^{1,3,5(10)}$ -estratrieno[17,16-d]pyrimidine (3a)

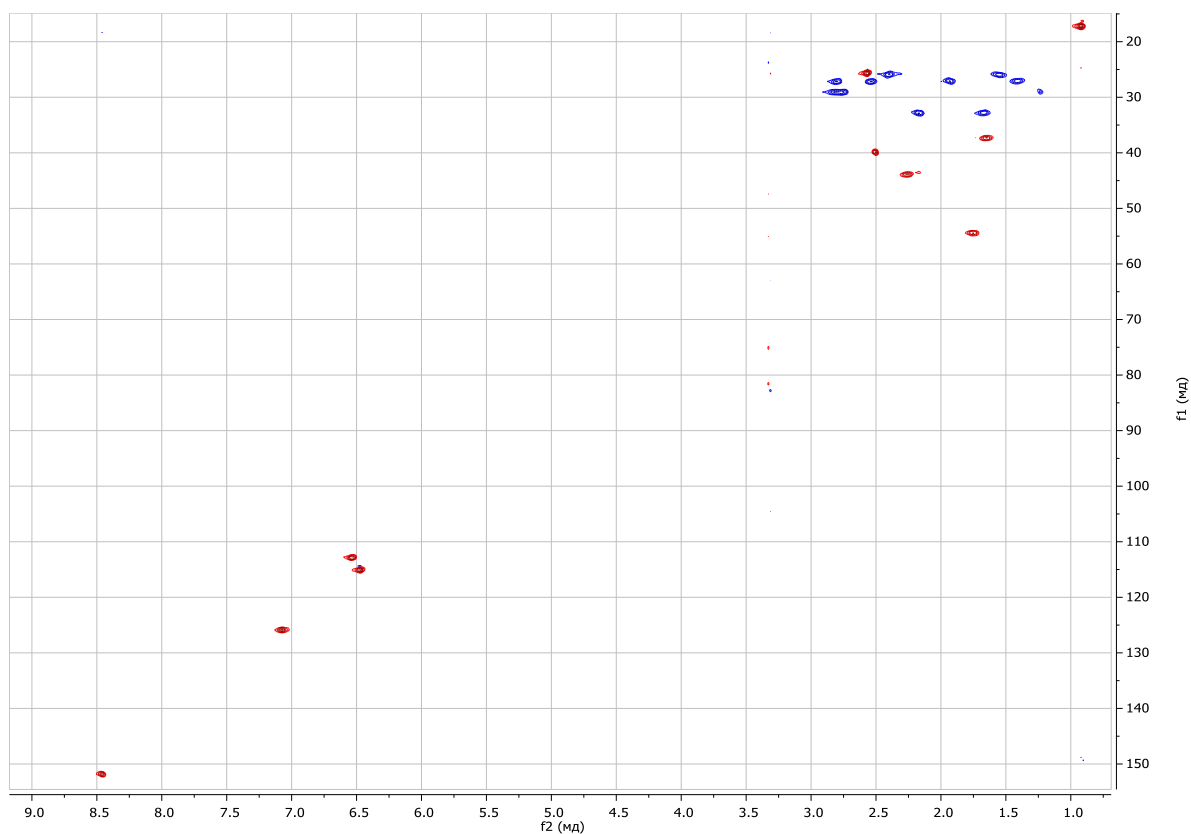

$^1\text{H}$ - $^{13}\text{C}$  HMBC NMR (DMSO- $d_6$ ) spectrum of  
3-hydroxy-2'-methyl- $\Delta^{1,3,5(10)}$ -estratrieno[17,16-d]pyrimidine (3a)

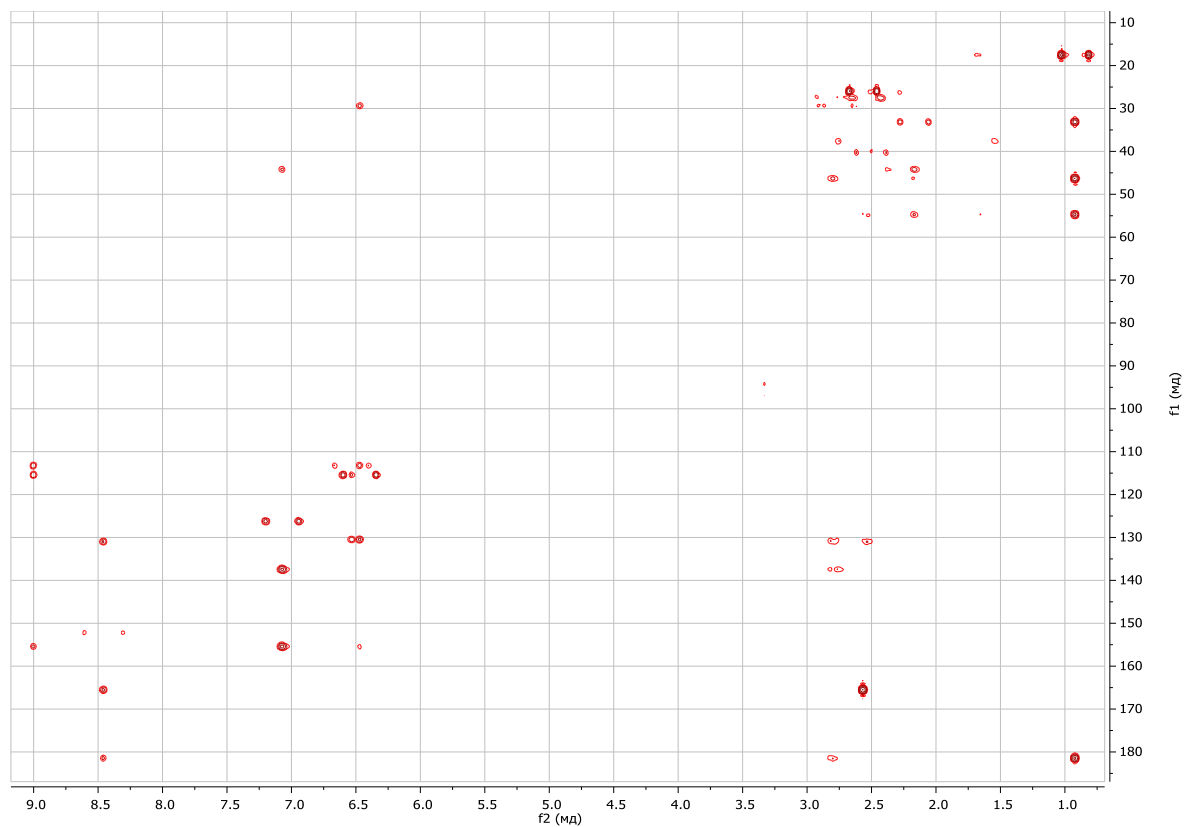

$^1\text{H}$ - $^1\text{H}$  COSY NMR (DMSO- $d_6$ ) spectrum of  
3-hydroxy-2'-methyl- $\Delta^{1,3,5(10)}$ -estratrieno[17,16-d]pyrimidine (3a)

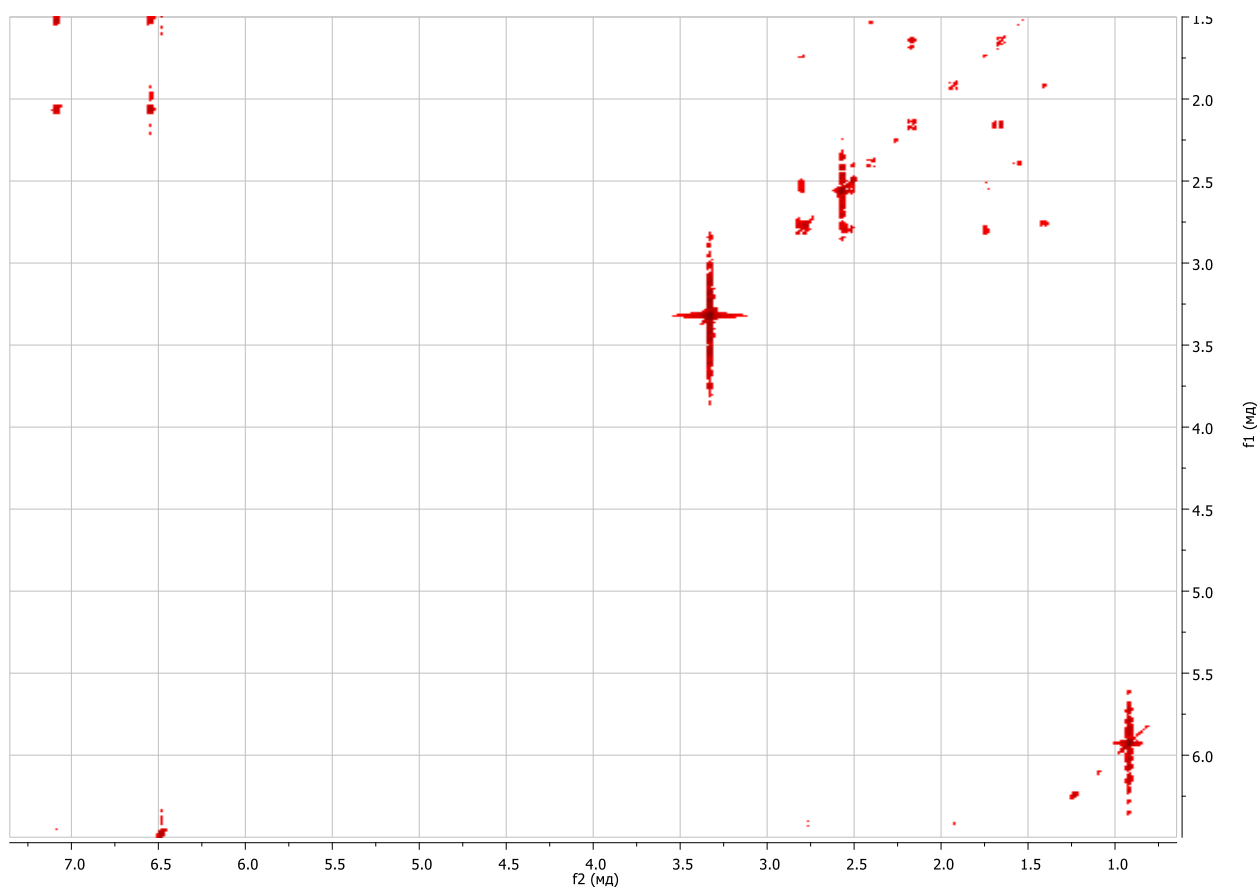

<sup>1</sup>H NMR (DMSO-d<sub>6</sub>, 600 MHz) spectrum of  
2'-amino-3-hydroxy-Δ<sup>1,3,5(10)</sup>-estratrieno[17,16-d]pyrimidine (3b)

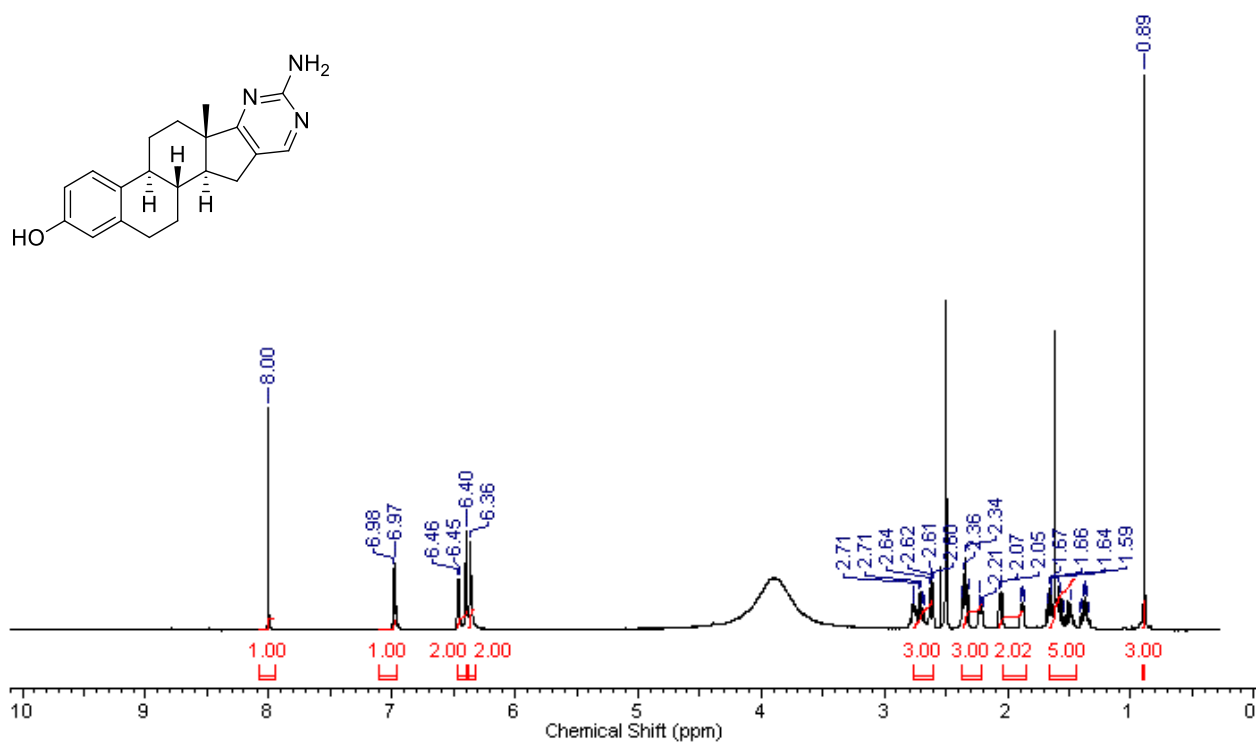

<sup>13</sup>C NMR (DMSO-d<sub>6</sub>, 150 MHz) spectrum of  
2'-amino-3-hydroxy-Δ<sup>1,3,5(10)</sup>-estratrieno[17,16-d]pyrimidine (3b)

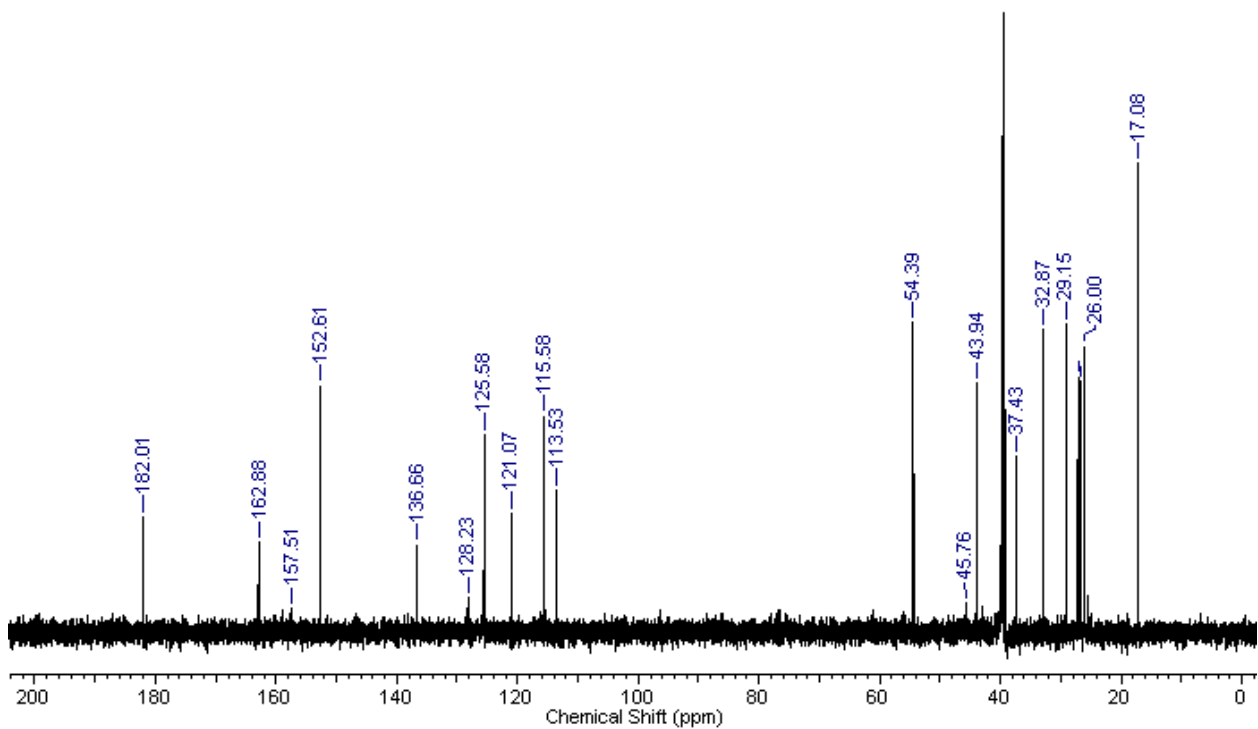

$^1\text{H}$ - $^{13}\text{C}$  HSQC NMR (DMSO- $d_6$ , 600 MHz) spectrum of  
**2'-amino-3-hydroxy- $\Delta$ 1,3,5(10)-estratrieno[17,16-d]pyrimidine (3b)**

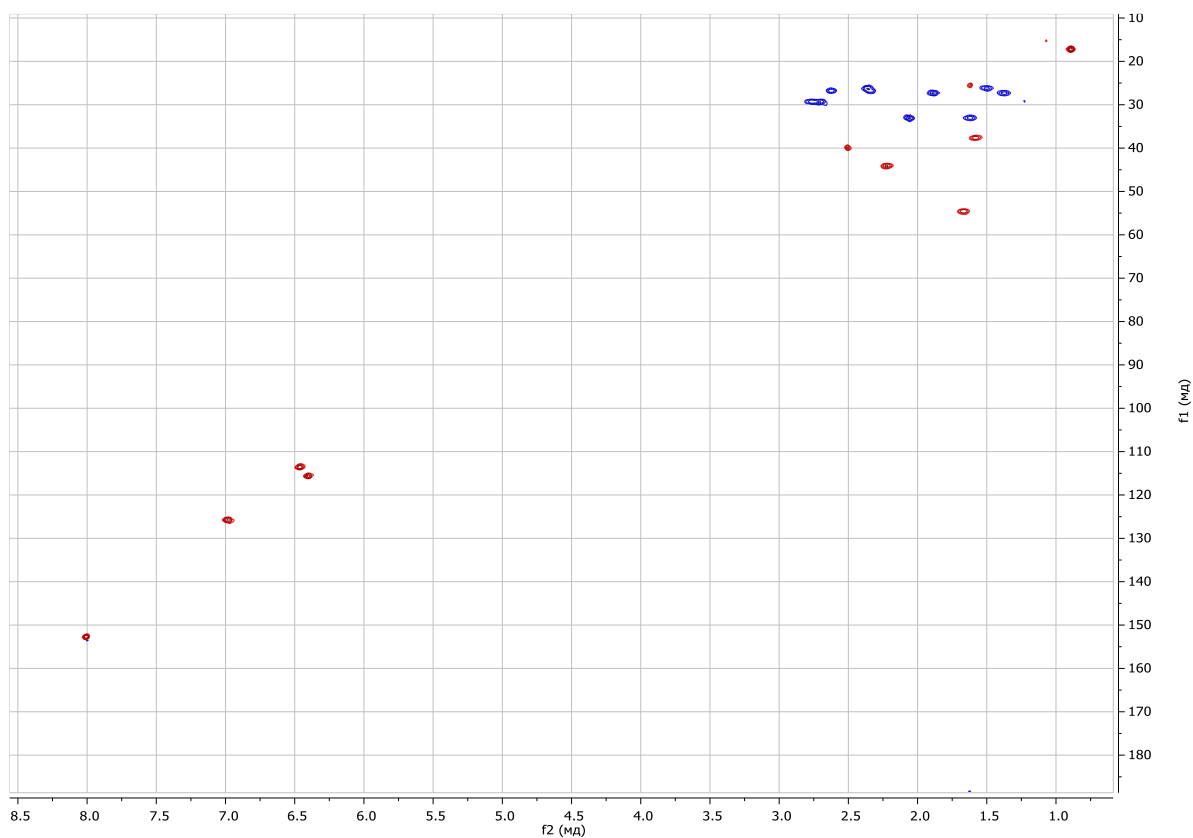

$^1\text{H}$ - $^{13}\text{C}$  HMBC NMR (DMSO- $d_6$ , 600 MHz) spectrum of  
**2'-amino-3-hydroxy- $\Delta$ 1,3,5(10)-estratrieno[17,16-d]pyrimidine (3b)**

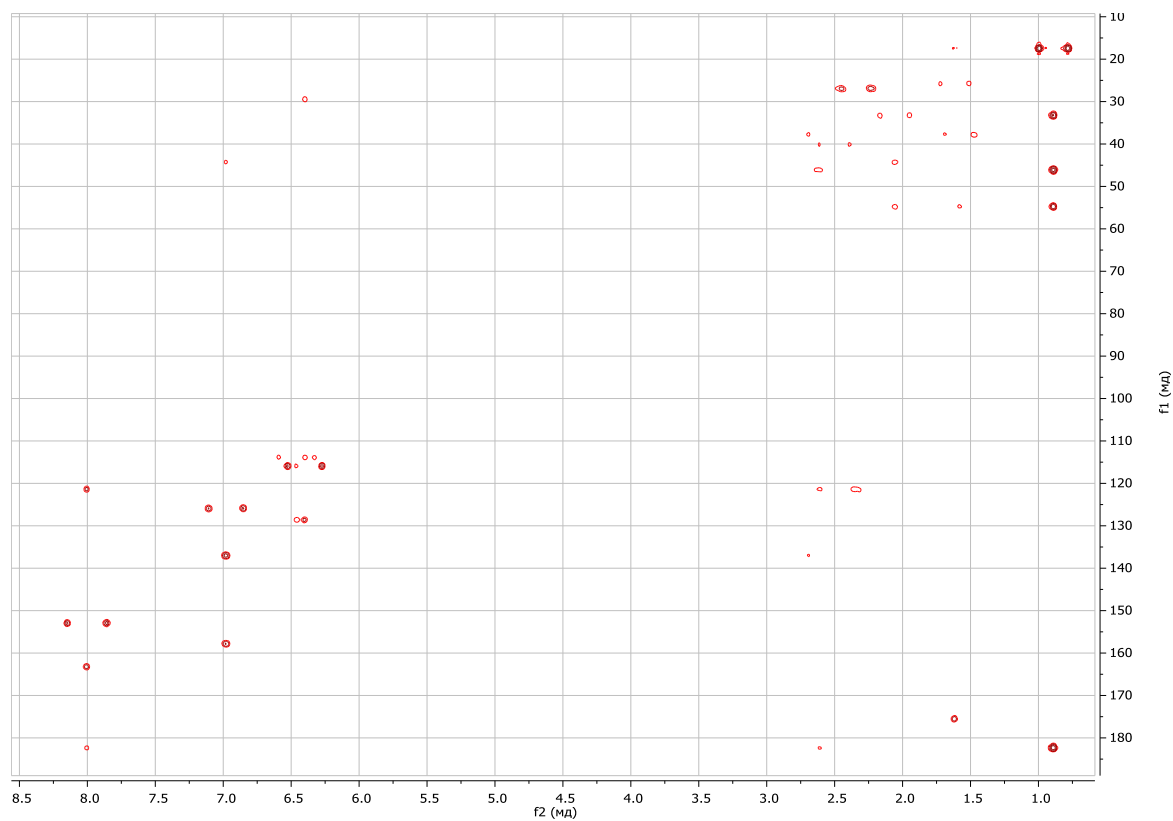

$^1\text{H}$ - $^1\text{H}$  COSY NMR (DMSO- $d_6$ , 600 MHz) spectrum of  
**2'-amino-3-hydroxy- $\Delta$ 1,3,5(10)-estratrieno[17,16-d]pyrimidine (3b)**

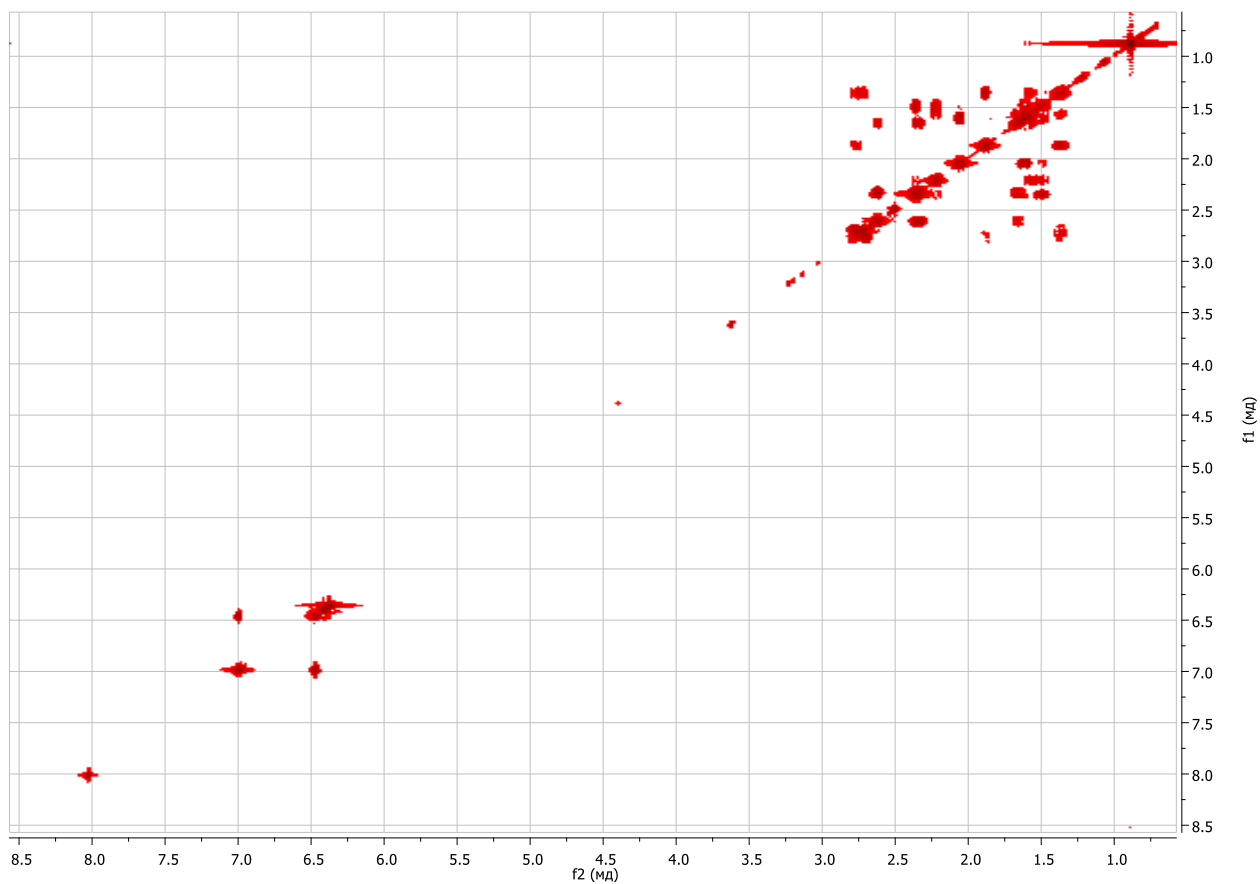

<sup>1</sup>H NMR (DMSO-d<sub>6</sub>, 600 MHz at 303K) spectrum of

**3β-acetoxy-3'-methyl-5-androsteno[17,16-d]pyrimidine (3c)**

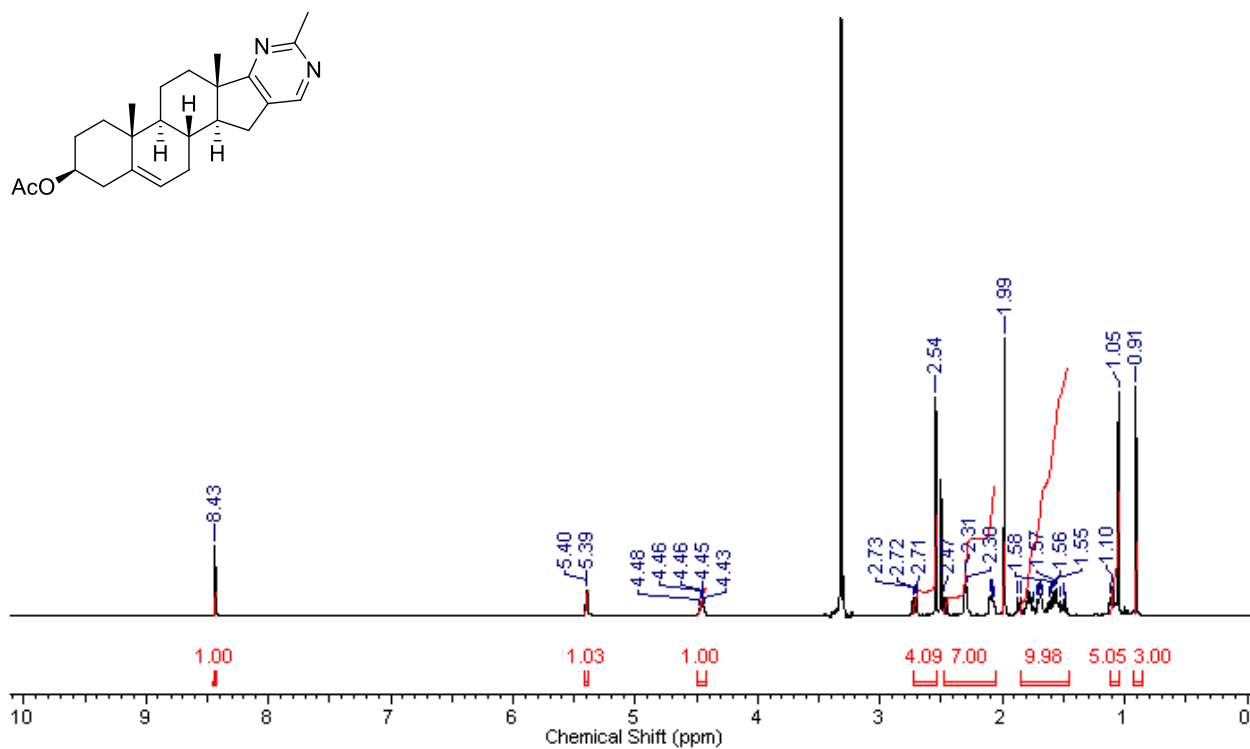

<sup>13</sup>C NMR (DMSO-d<sub>6</sub>, 150 MHz at 303K) spectrum of

**3β-acetoxy-3'-methyl-5-androsteno[17,16-d]pyrimidine (3c)**

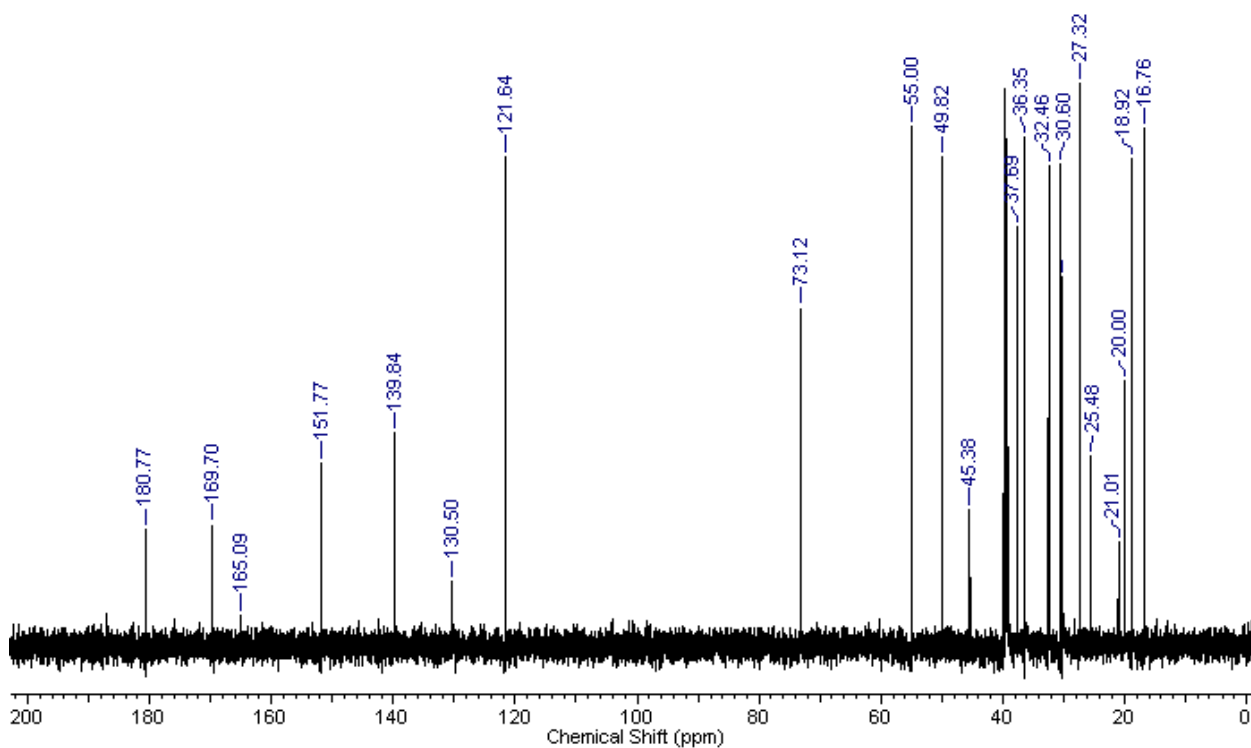



$^1\text{H}$ - $^{13}\text{C}$  HSQC NMR (DMSO- $d_6$  at 303K) spectrum of  
**3 $\beta$ -acetoxy-3'-methyl-5-androsteno[17,16-d]pyrimidine (3c)**

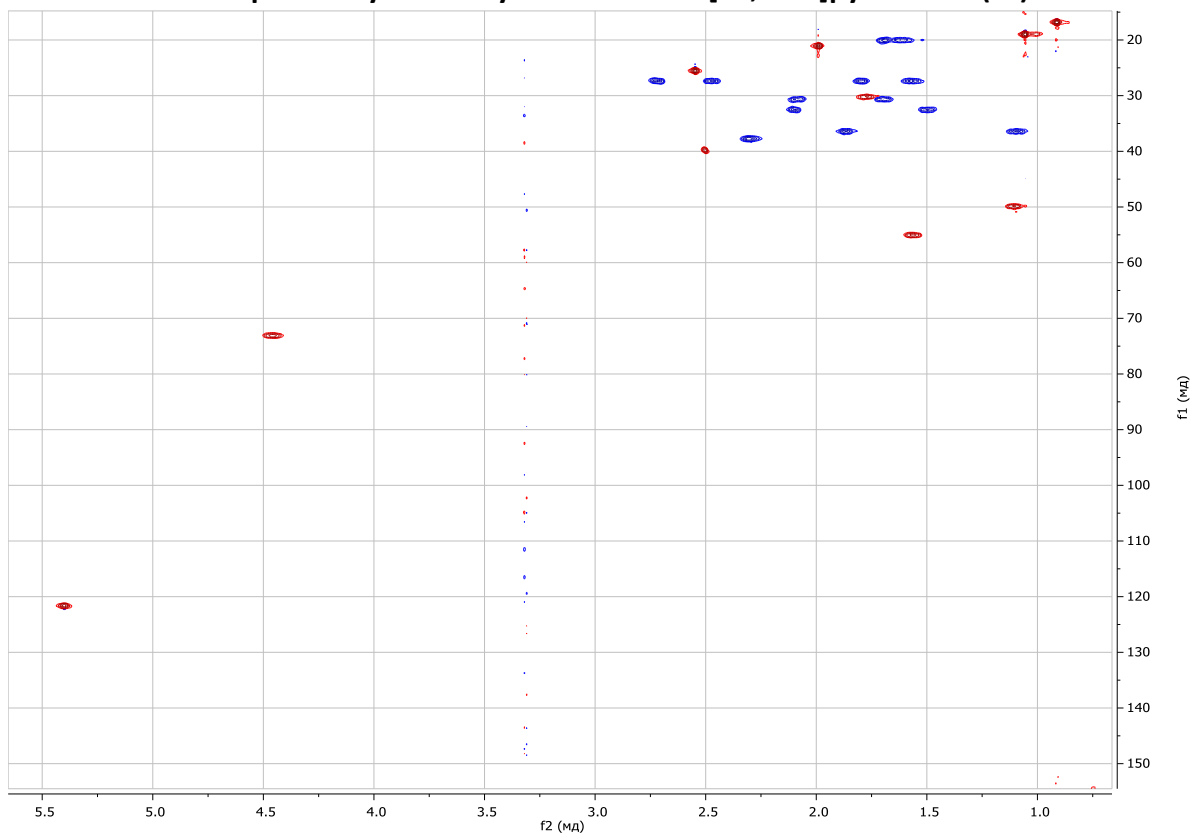

$^1\text{H}$ - $^{13}\text{C}$  HMBC NMR (DMSO- $d_6$  at 303K) spectrum of  
**3 $\beta$ -acetoxy-3'-methyl-5-androsteno[17,16-d]pyrimidine (3c)**

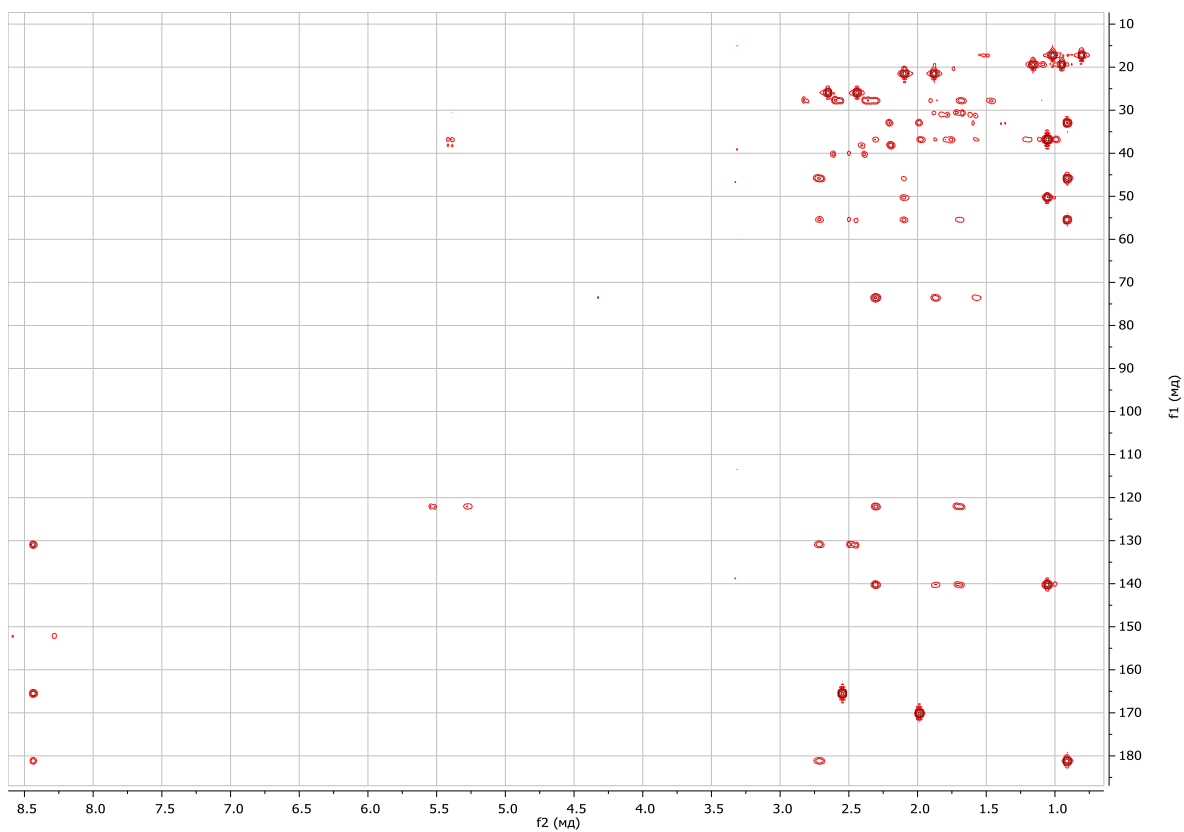

$^1\text{H}$ - $^1\text{H}$  COSY NMR (DMSO- $d_6$  at 303K) spectrum of  
**3 $\beta$ -acetoxy-3'-methyl-5-androsteno[17,16-d]pyrimidine (3c)**

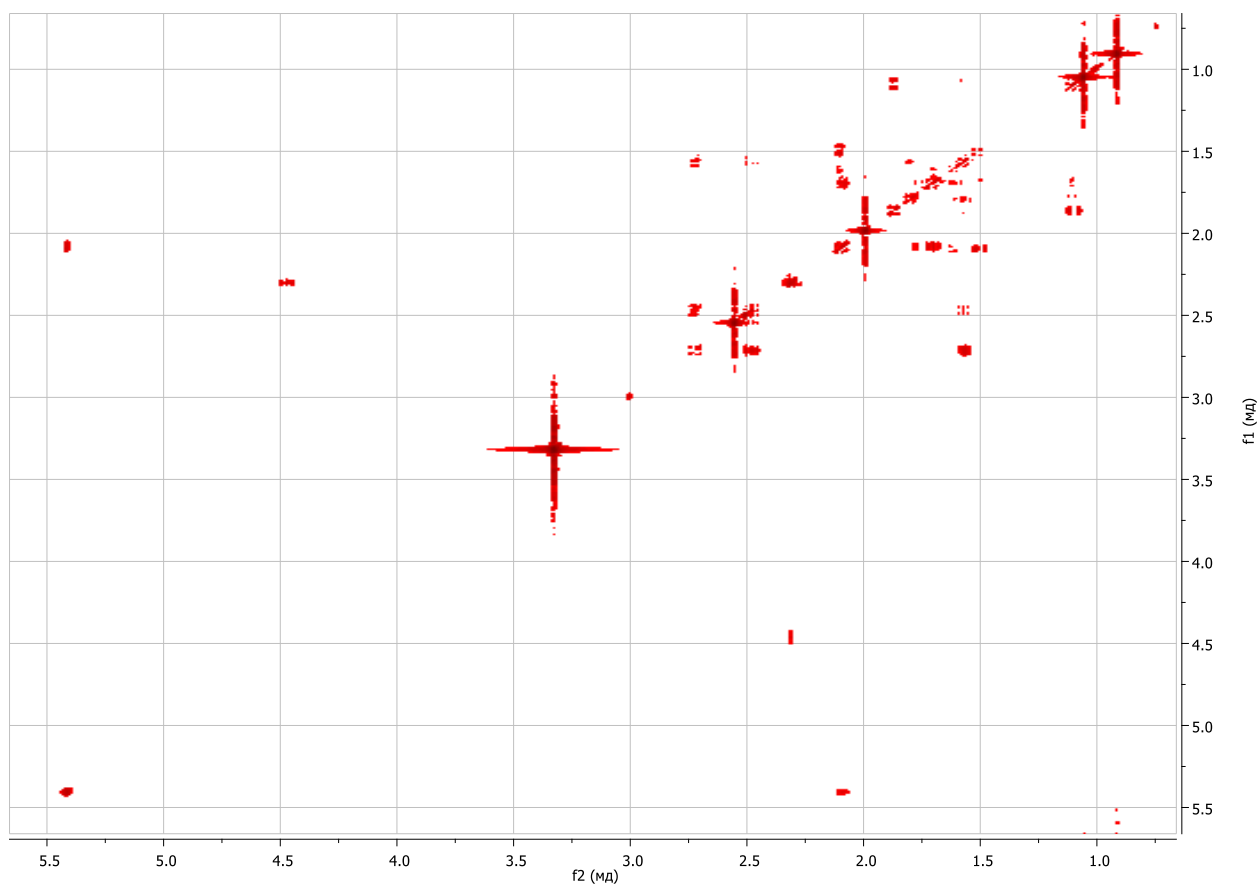

<sup>1</sup>H NMR (DMSO-d<sub>6</sub>+ CCl<sub>4</sub>, 600 MHz) spectrum of  
**3β-Hydroxy-3'-methyl-5-androsteno[17,16-d]pyrimidine (3d)**

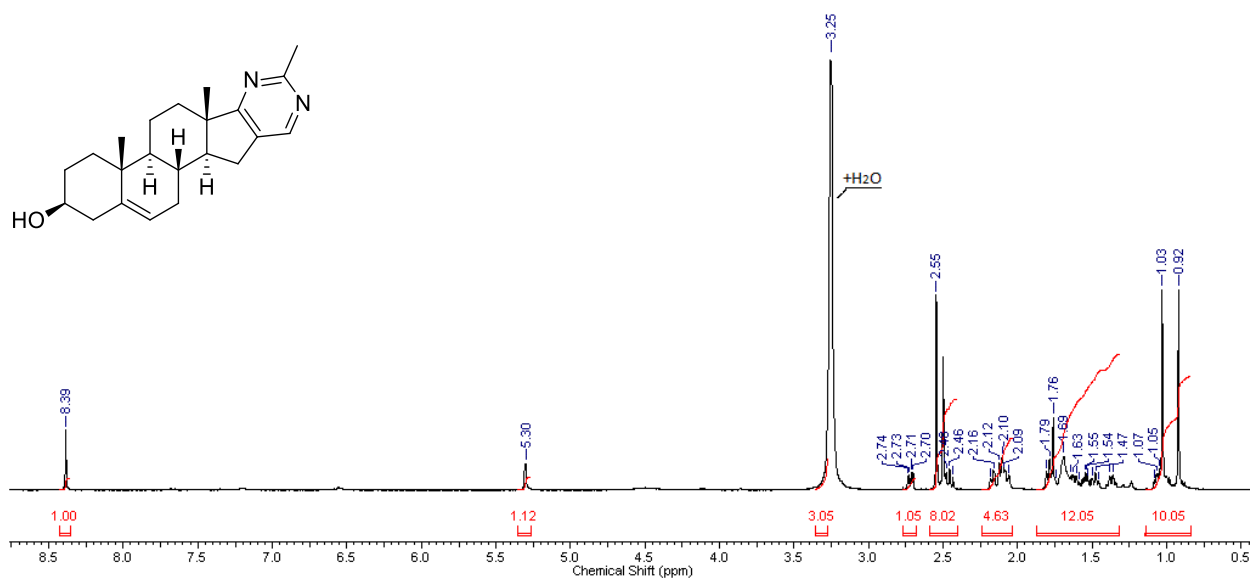

<sup>13</sup>C NMR (DMSO-d<sub>6</sub> + CCl<sub>4</sub>, 150 MHz) spectrum of  
**3β-Hydroxy-3'-methyl-5-androsteno[17,16-d]pyrimidine (3d)**

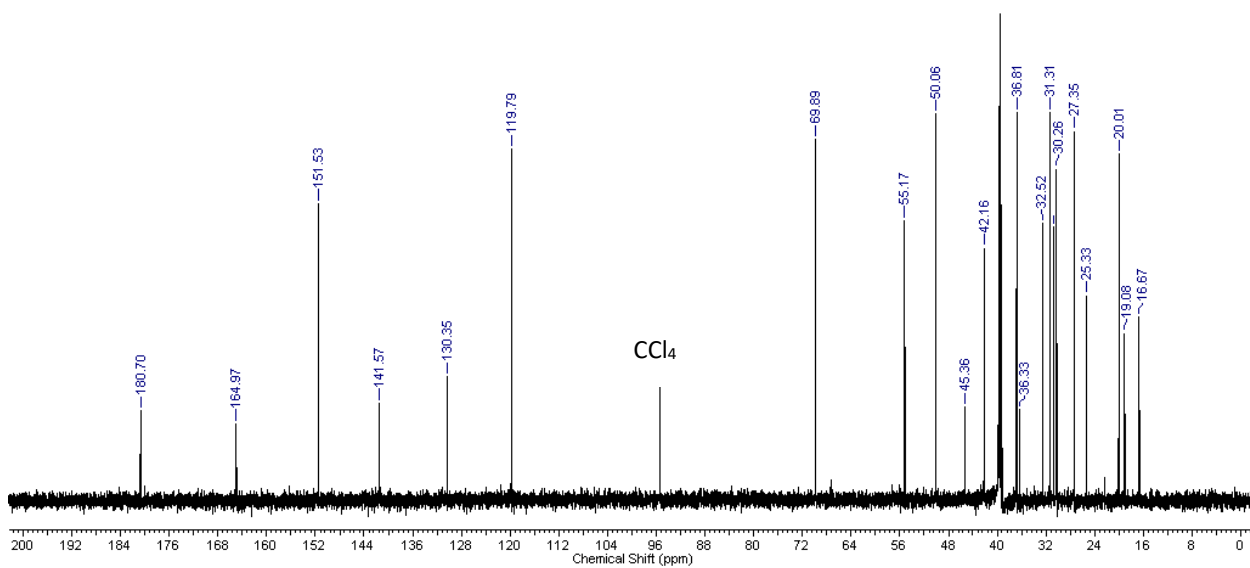

$^1\text{H}$ - $^{13}\text{C}$  HSQC NMR (DMSO- $d_6$  +  $\text{CCl}_4$ , 600 MHz) spectrum of  
**3 $\beta$ -Hydroxy-3'-methyl-5-androsteno[17,16-d]pyrimidine (3d)**

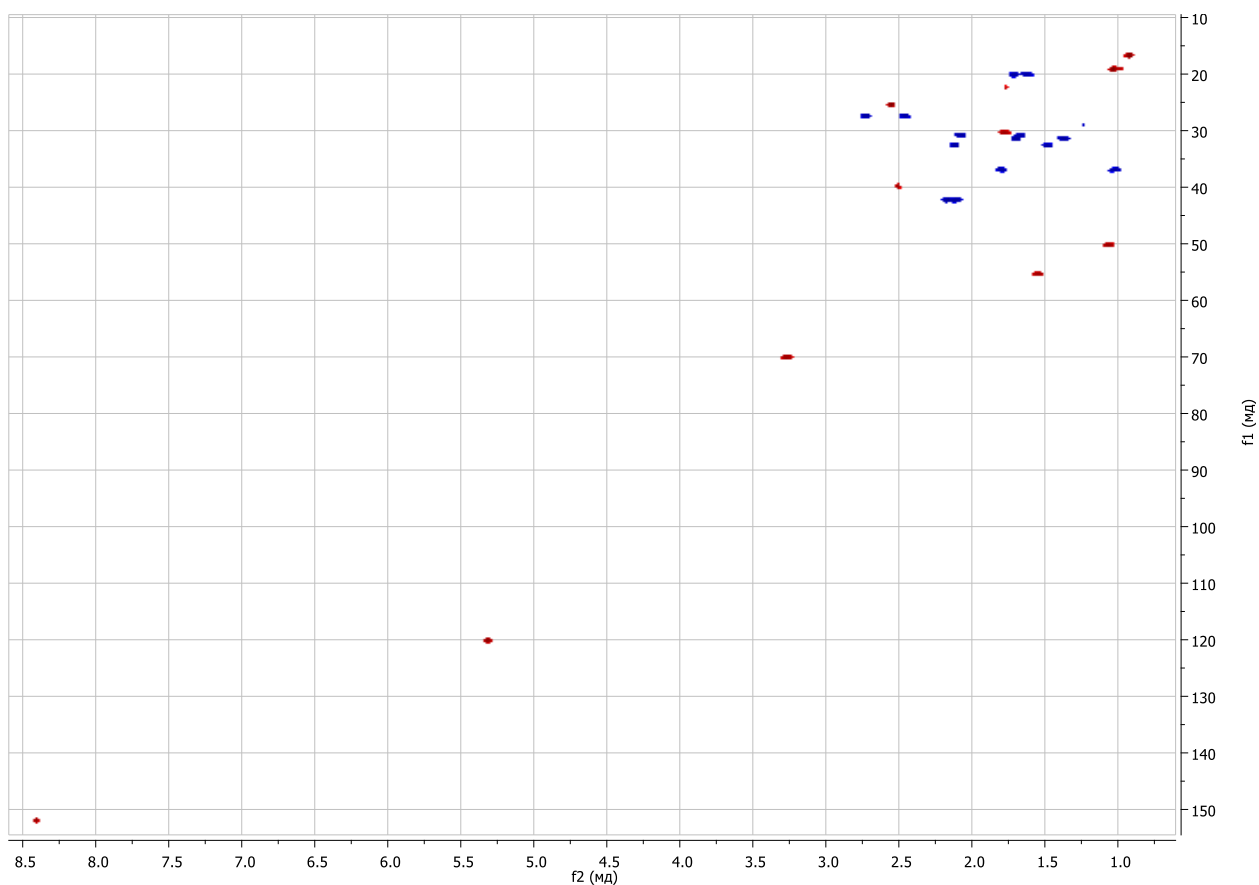

$^1\text{H}$ - $^{13}\text{C}$  HMBC NMR (DMSO- $d_6$  +  $\text{CCl}_4$ , 600 MHz) spectrum of  
**3 $\beta$ -Hydroxy-3'-methyl-5-androsteno[17,16-d]pyrimidine (3d)**

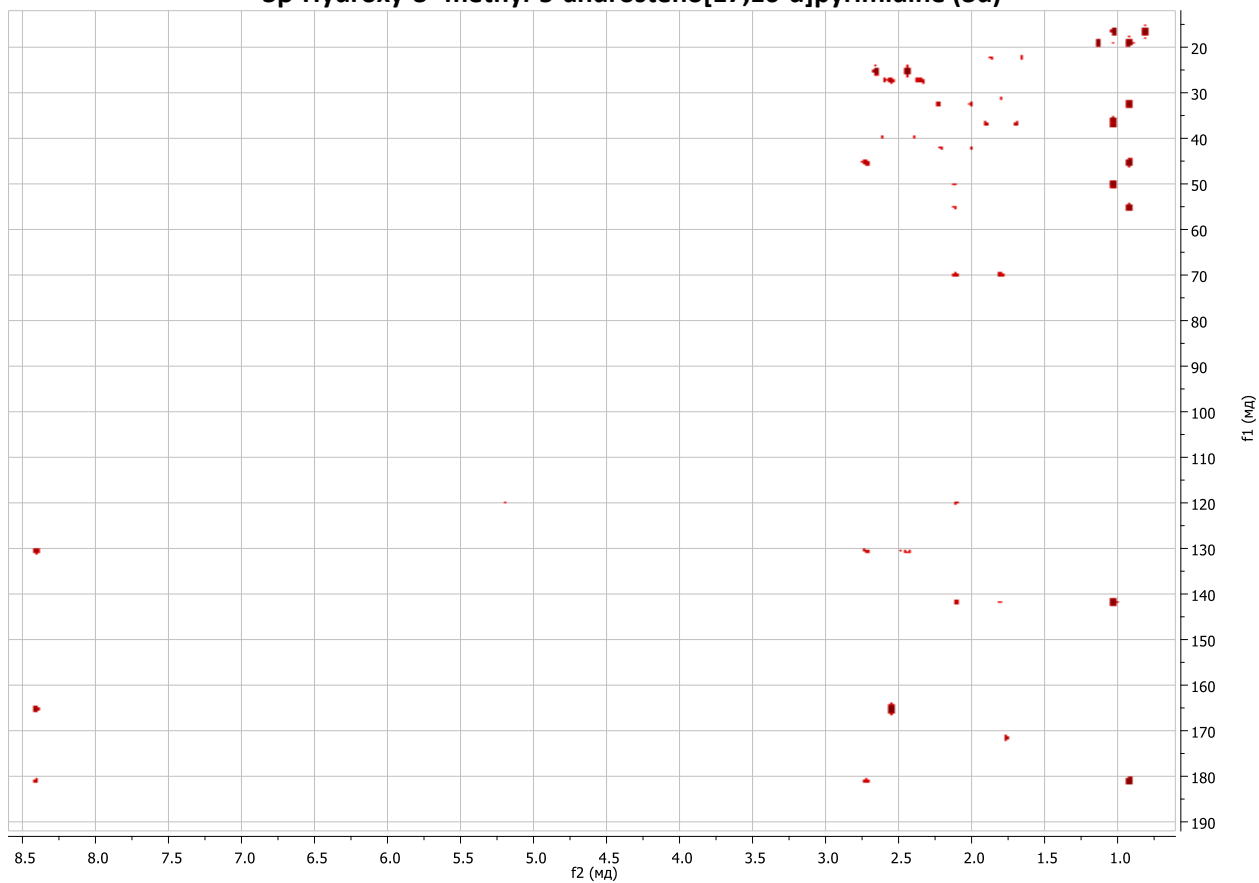

$^1\text{H}$ - $^1\text{H}$  COSY NMR (DMSO- $d_6$  +  $\text{CCl}_4$ ) spectrum of  
**3 $\beta$ -Hydroxy-3'-methyl-5-androsteno[17,16- $d$ ]pyrimidine (3d)**

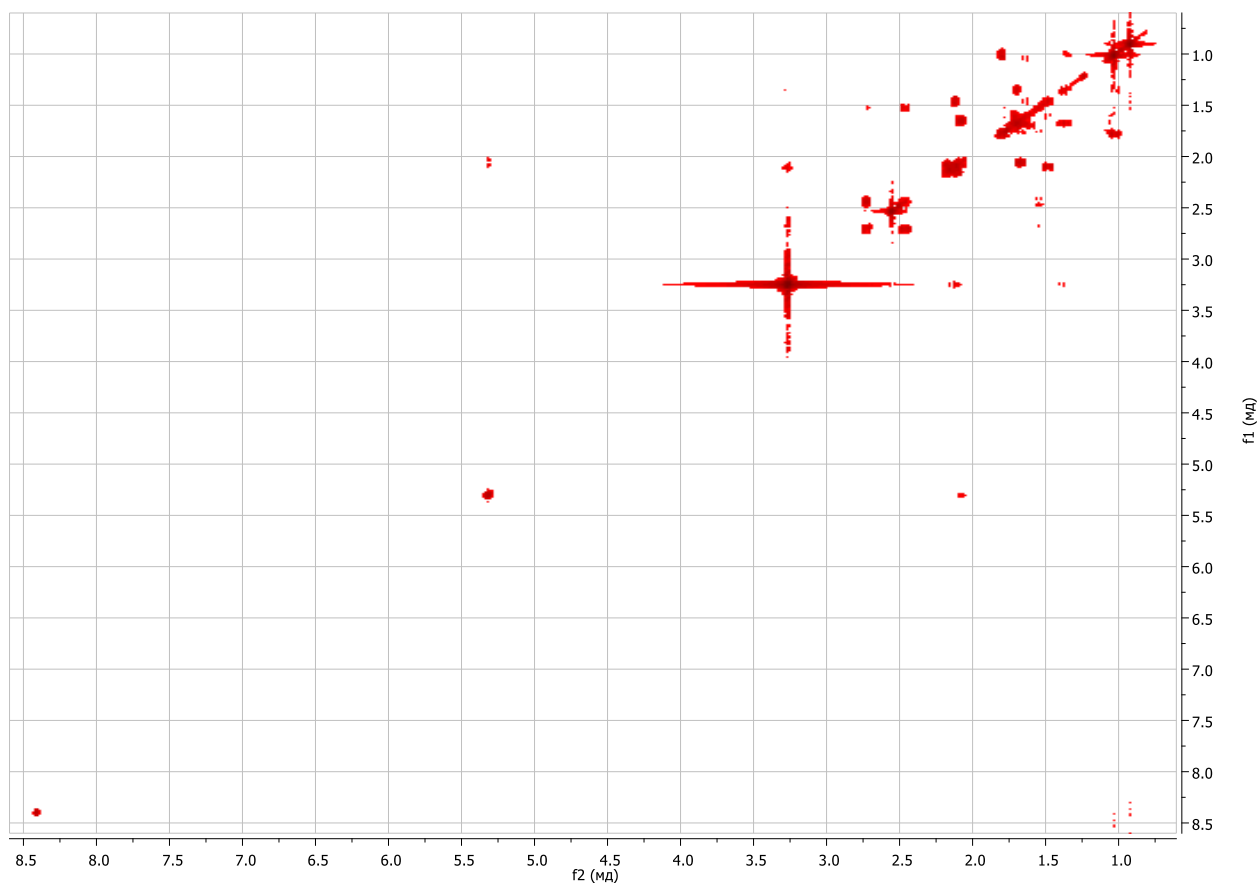

<sup>1</sup>H NMR (DMSO-d<sub>6</sub>, 600 MHz at 333K) spectrum of  
2'-amino-3β-hydroxy-5-androsteno[17,16-d]pyrimidine (3e)

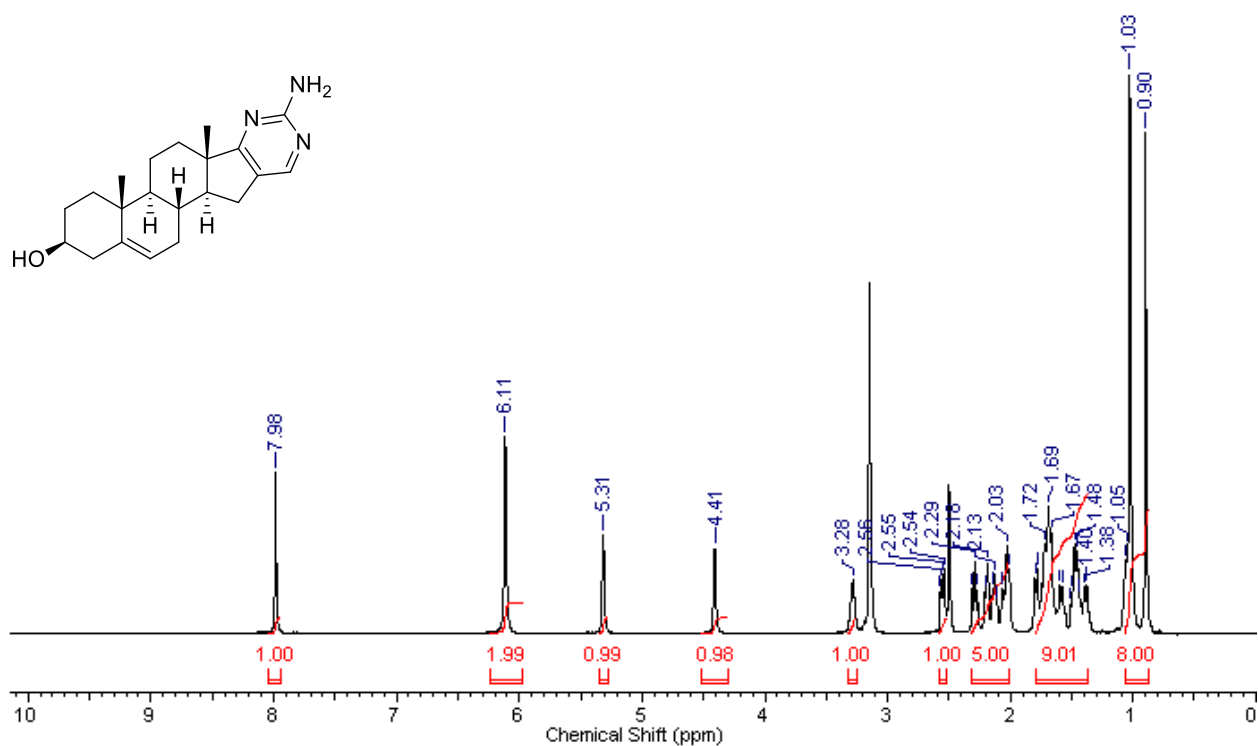

<sup>13</sup>C NMR (DMSO-d<sub>6</sub>, 150 MHz at 333K) spectrum of  
2'-amino-3β-hydroxy-5-androsteno[17,16-d]pyrimidine (3e)

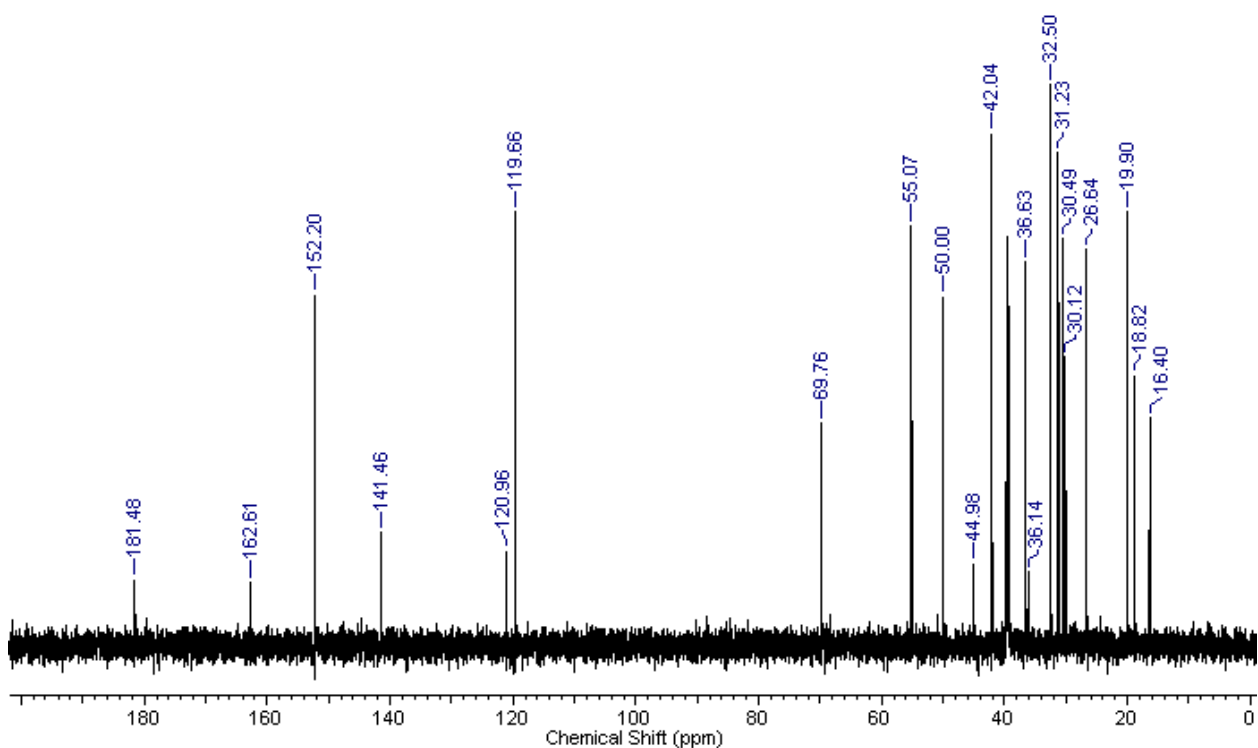

$^1\text{H}$ - $^{13}\text{C}$  HSQC NMR (DMSO- $d_6$  at 333K, 600 MHz) spectrum of  
**2'-amino-3 $\beta$ -hydroxy-5-androsteno[17,16-d]pyrimidine (3e)**

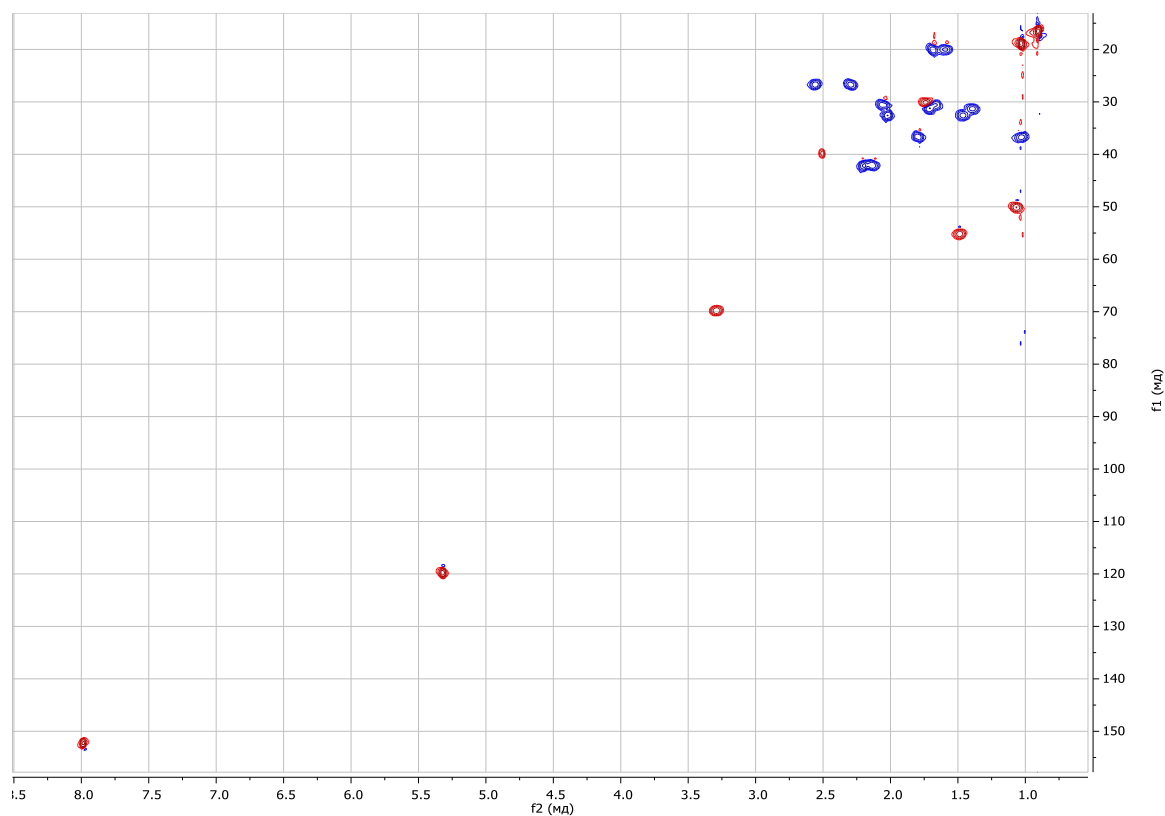

$^1\text{H}$ - $^{13}\text{C}$  HMBC NMR (DMSO- $d_6$  at 333K, 600 MHz) spectrum of  
**2'-amino-3 $\beta$ -hydroxy-5-androsteno[17,16-d]pyrimidine (3e)**

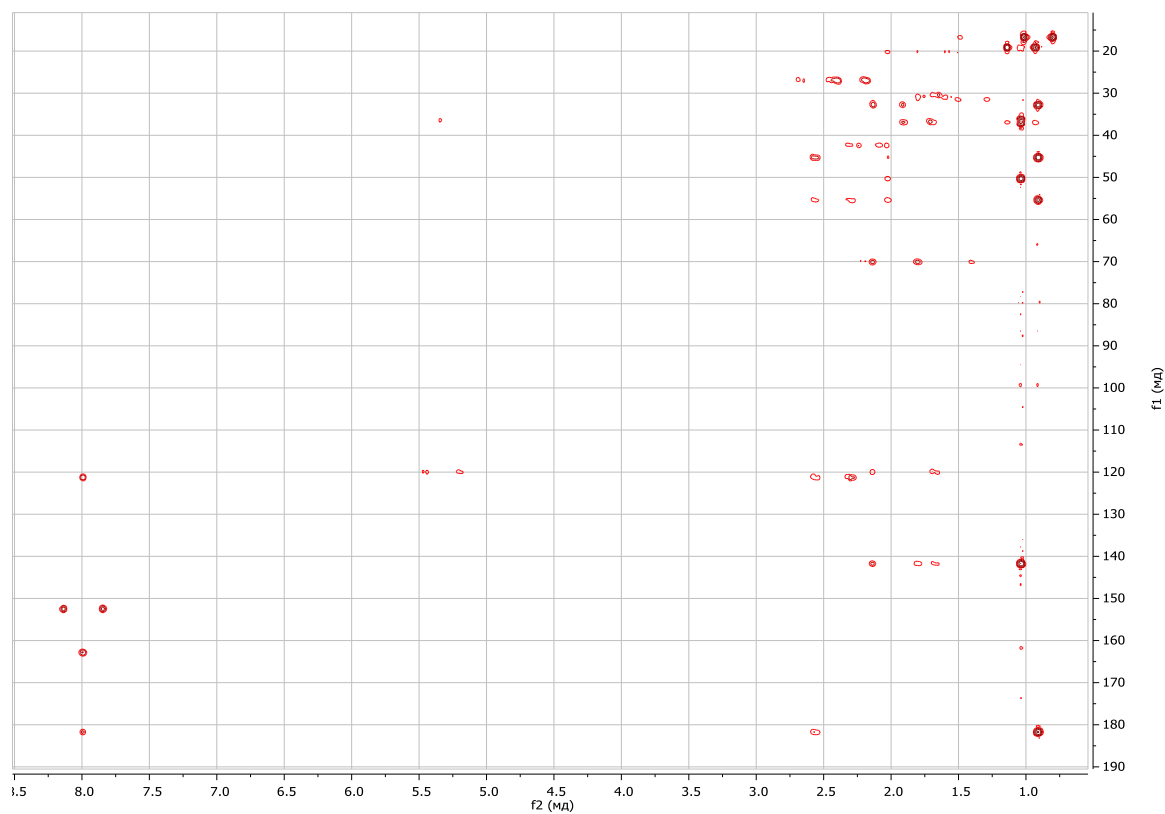

<sup>1</sup>H NMR (DMSO-d<sub>6</sub>, 600 MHz) spectrum of  
2'-amino-17β-hydroxy-5α-androstano[2,3-d]pyrimidine (3f)

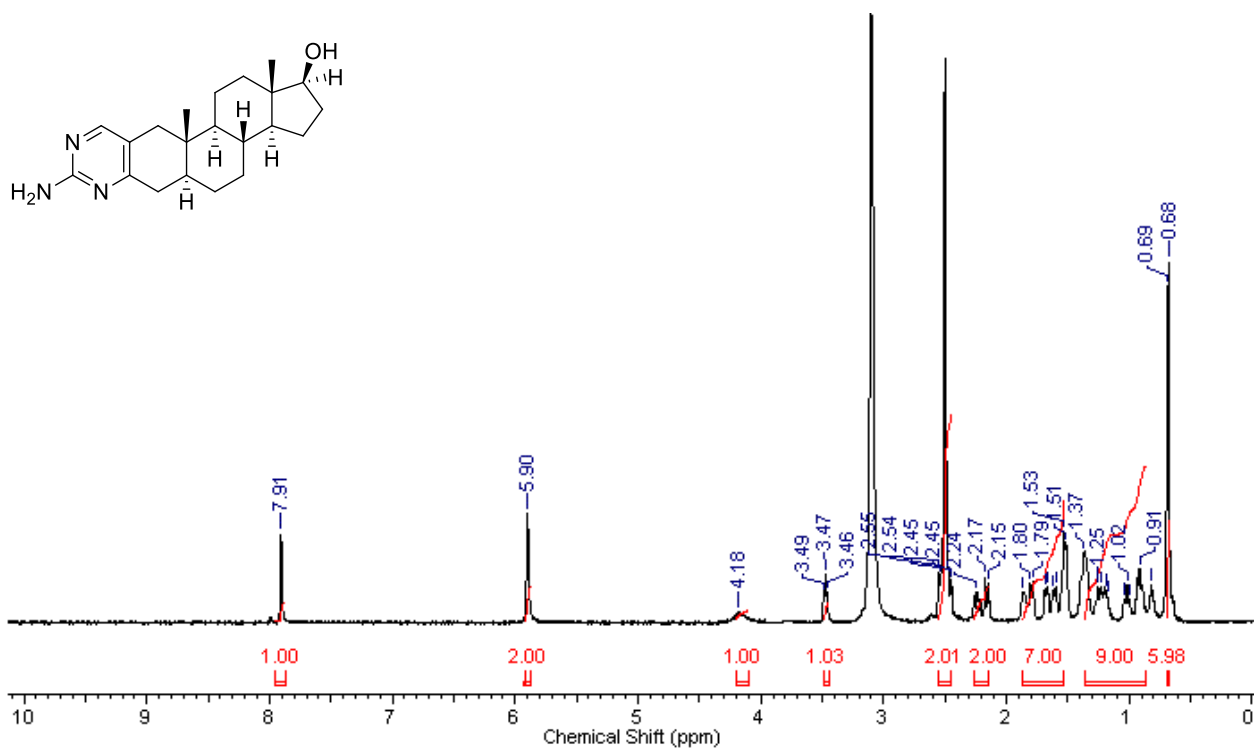

<sup>13</sup>C NMR (DMSO-d<sub>6</sub>, 150 MHz) spectrum of  
2'-amino-17β-hydroxy-5α-androstano[2,3-d]pyrimidine (3f)

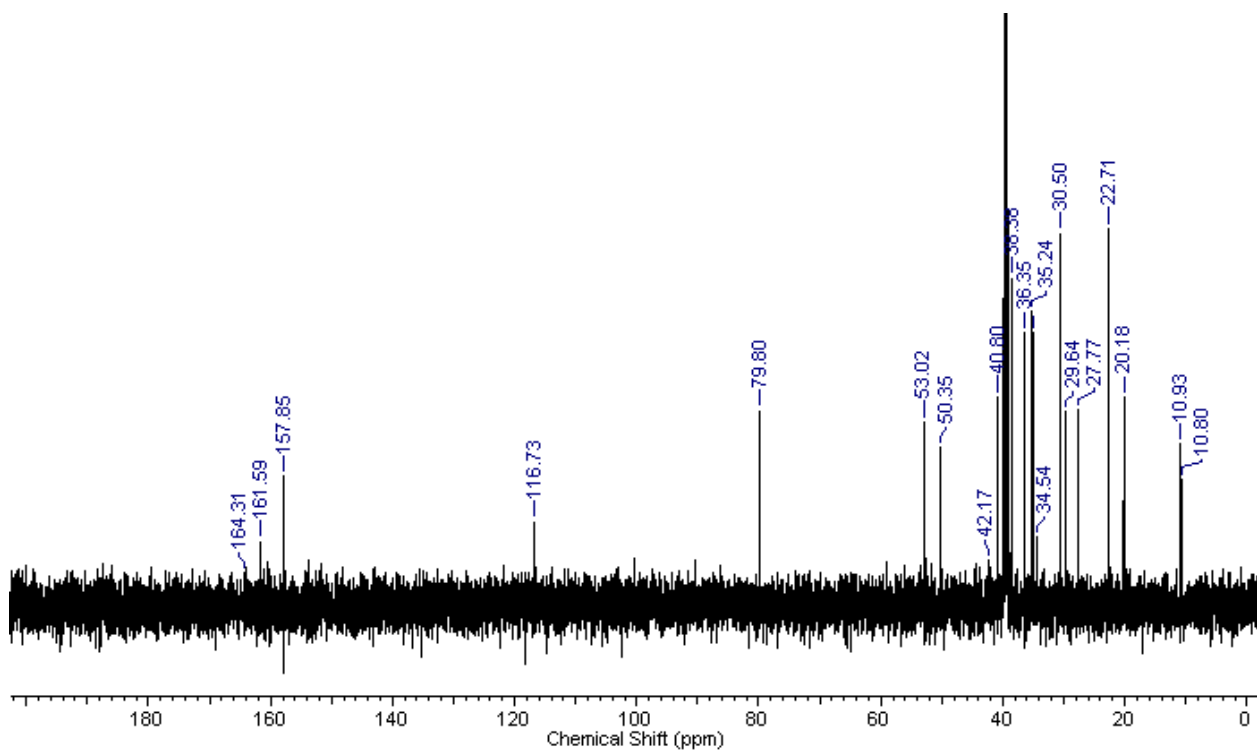



$^1\text{H}$ - $^{13}\text{C}$  HSQC NMR (DMSO- $d_6$ , 600 MHz) spectrum of  
**2'-amino-17 $\beta$ -hydroxy-5 $\alpha$ -androstand[2,3-d]pyrimidine (3f)**

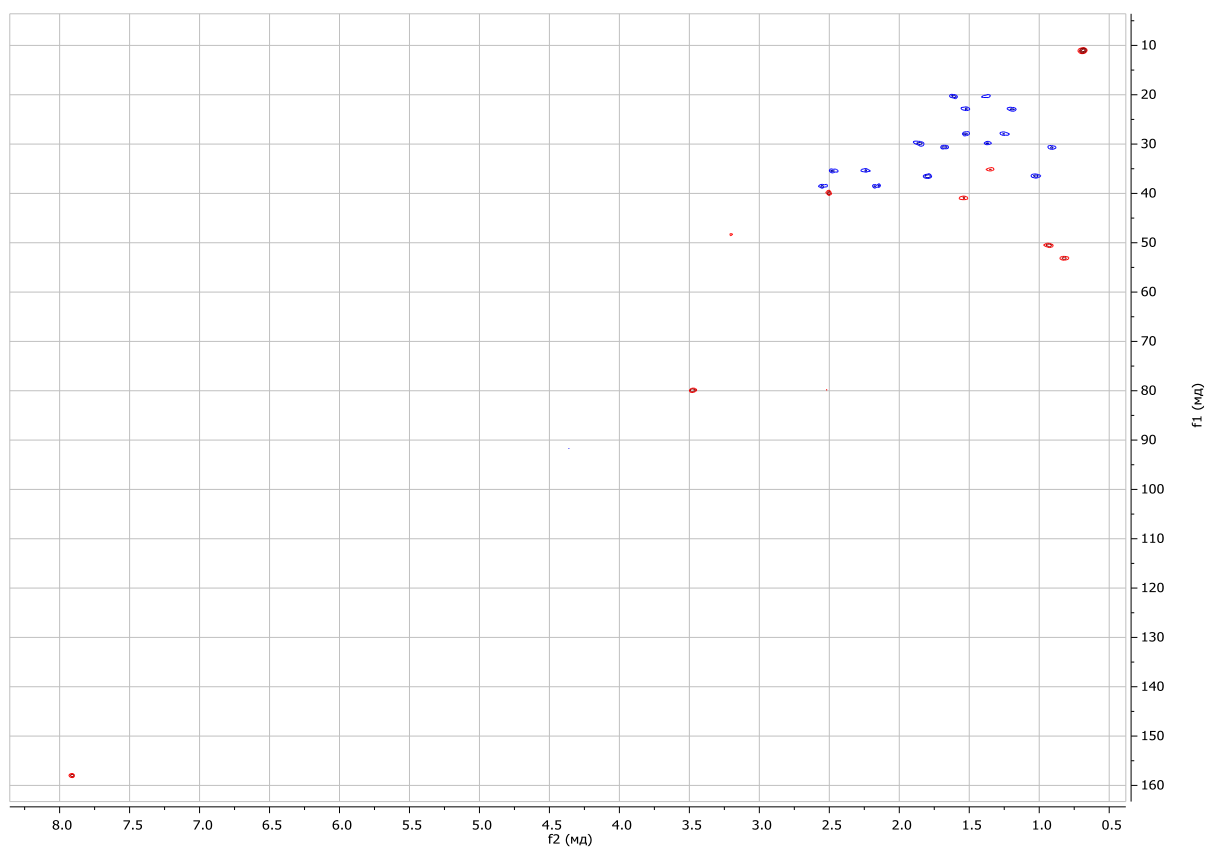

$^1\text{H}$ - $^{13}\text{C}$  HMBC NMR (DMSO- $d_6$ , 600 MHz) spectrum of  
**2'-amino-17 $\beta$ -hydroxy-5 $\alpha$ -androstand[2,3-d]pyrimidine (3f)**

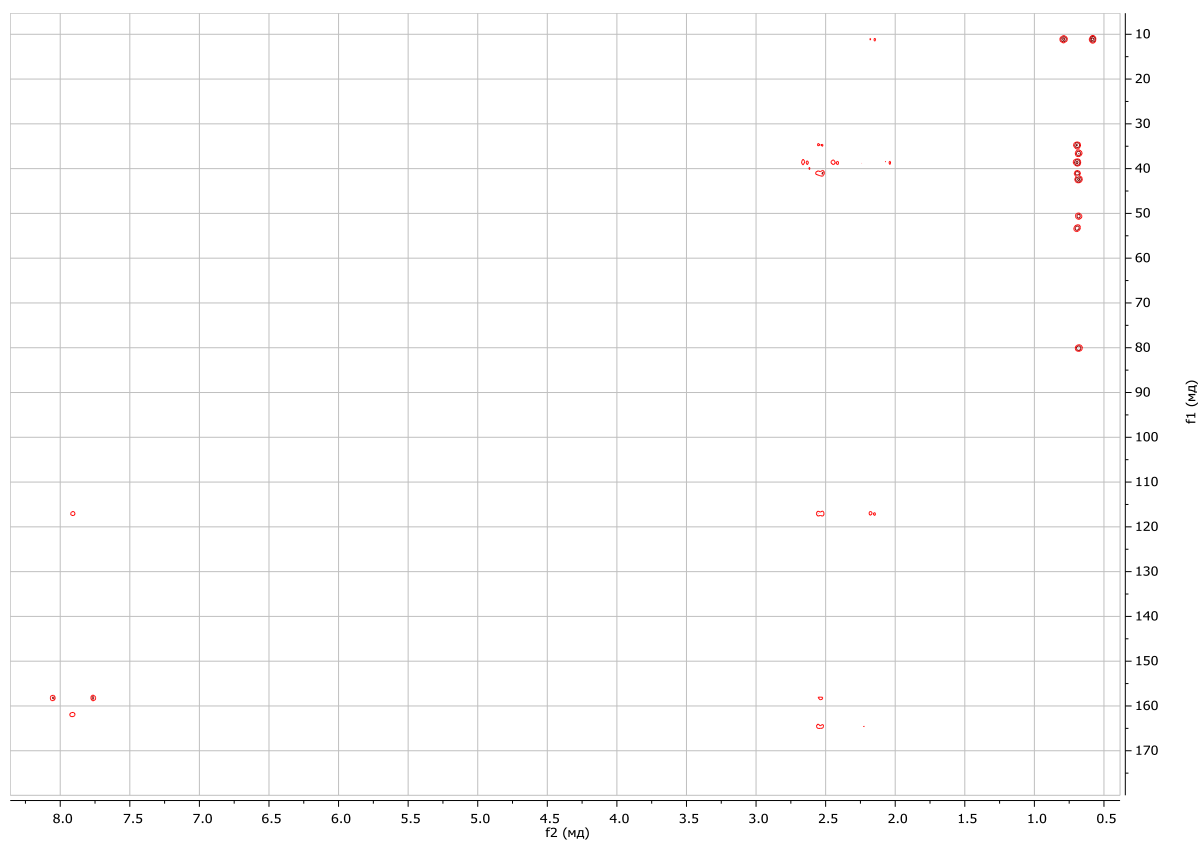

$^1\text{H}$ - $^1\text{H}$  COSY NMR (DMSO- $d_6$ , 600 MHz) spectrum of  
2'-amino-17 $\beta$ -hydroxy-5 $\alpha$ -androstand[2,3- $d$ ]pyrimidine (3f)

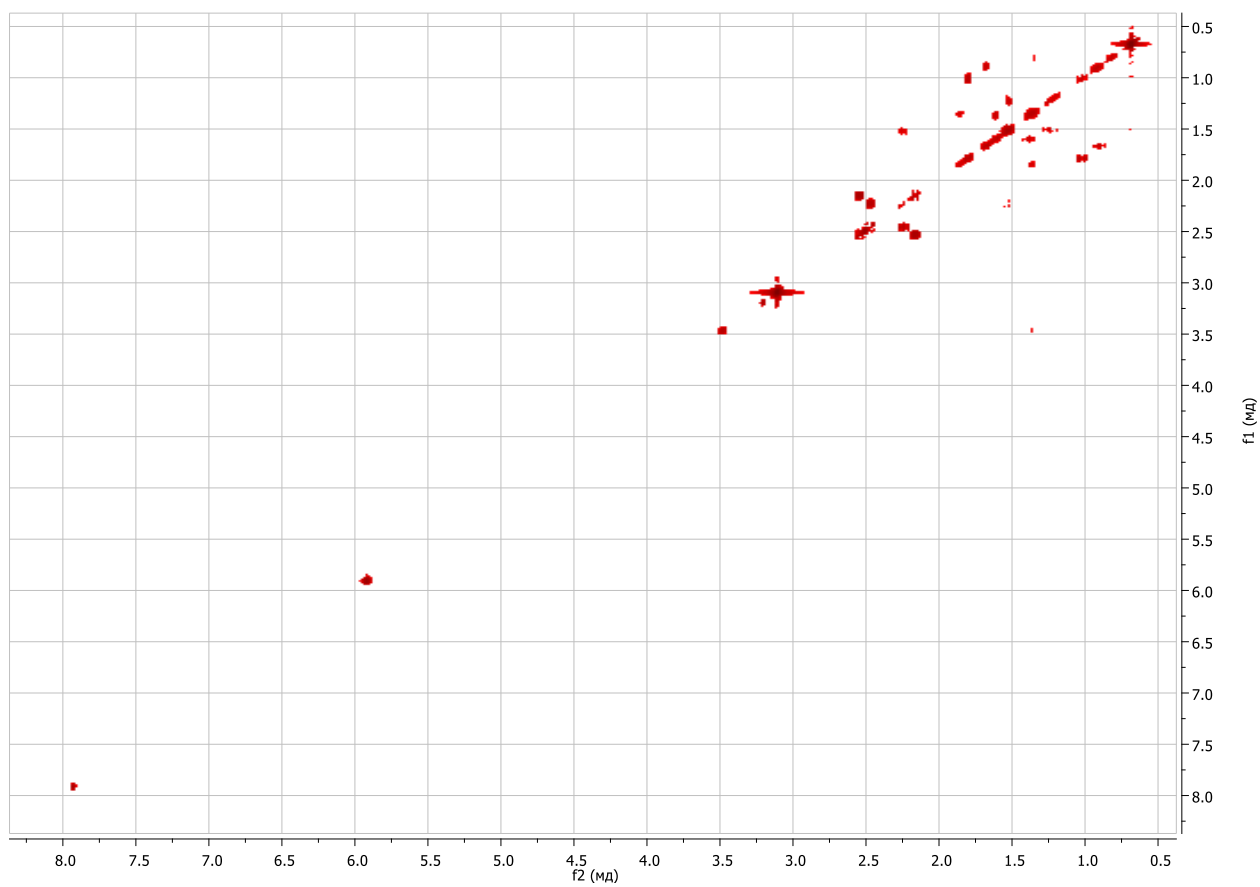

<sup>1</sup>H NMR (DMSO-d<sub>6</sub>, 600 MHz) spectrum of  
16-(4, 6-dimethyl-1,2-dihydro-1,3,5-triazin-2-yl)-17-chlor- $\Delta^{1,3,5(10),16}$ -estratetraen-3-ol (4a)

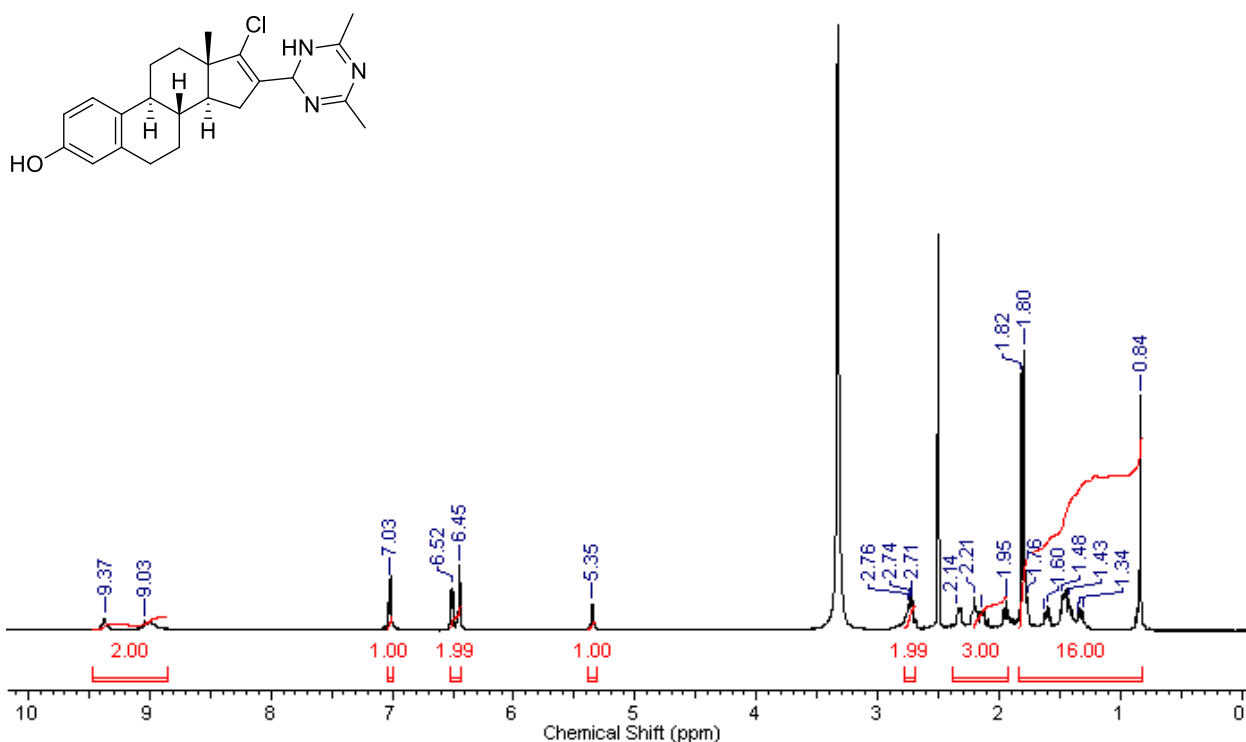

<sup>13</sup>C NMR (DMSO-d<sub>6</sub>, 150 MHz) spectrum of  
16-(4, 6-dimethyl-1,2-dihydro-1,3,5-triazin-2-yl)-17-chlor- $\Delta^{1,3,5(10),16}$ -estratetraen-3-ol (4a)

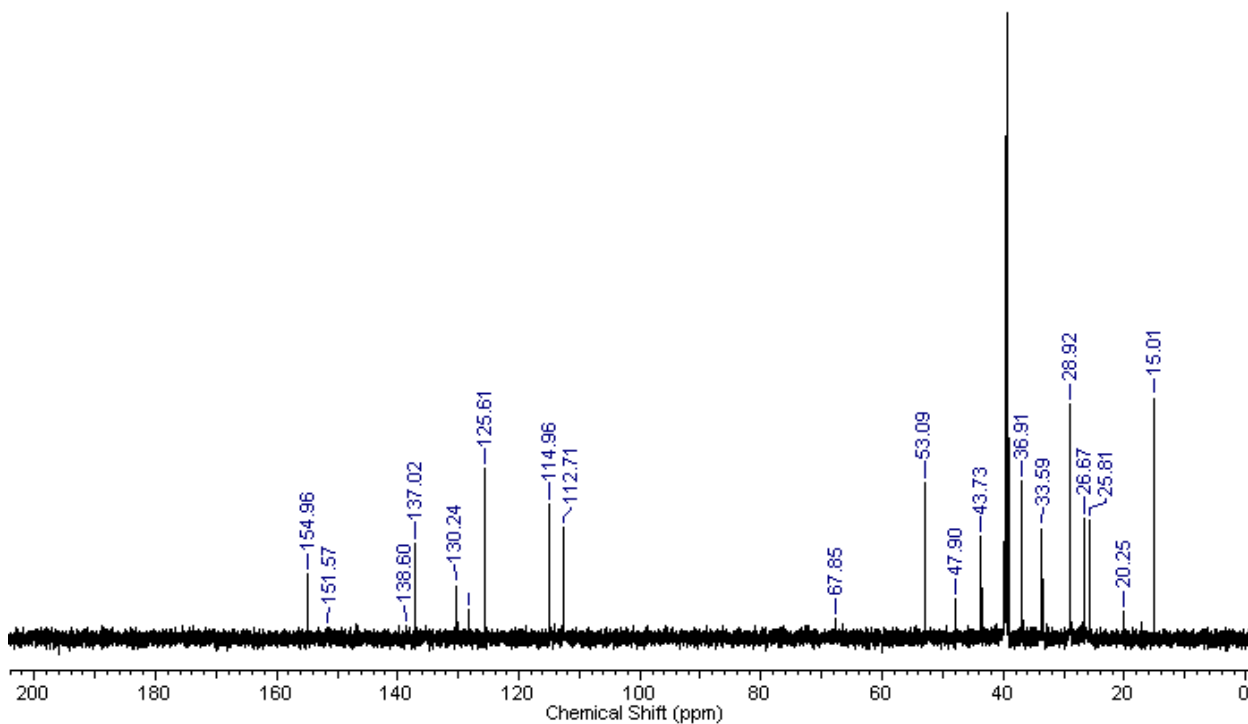

$^1\text{H}$ - $^{13}\text{C}$  HSQC NMR (DMSO- $d_6$ ) spectrum of  
**16-(4, 6-dimethyl-1,2-dihydro-1,3,5-triazin-2-yl)-17-chlor- $\Delta^{1,3,5(10),16}$ -estratetraen-3-ol (4a)**

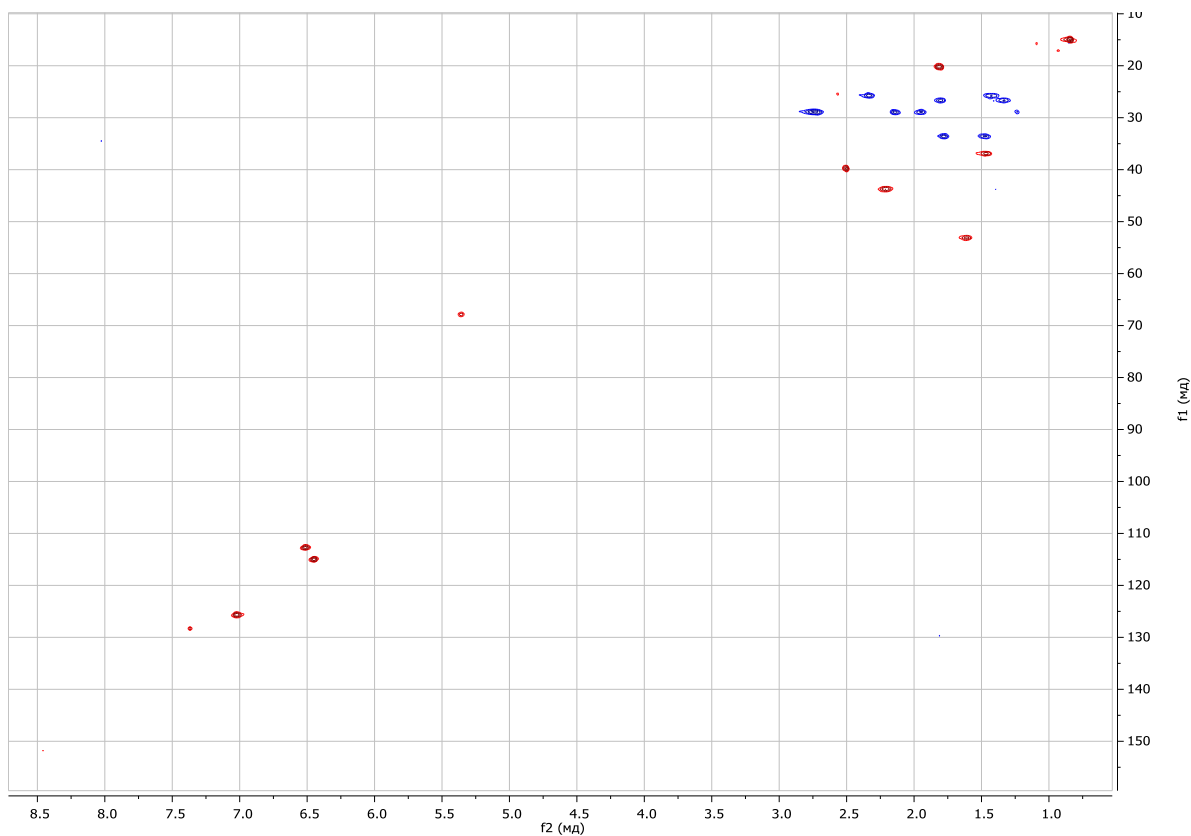

$^1\text{H}$ - $^{13}\text{C}$  HSQC NMR (DMSO- $d_6$ ) spectrum of  
**16-(4, 6-dimethyl-1,2-dihydro-1,3,5-triazin-2-yl)-17-chlor- $\Delta^{1,3,5(10),16}$ -estratetraen-3-ol (4a)**

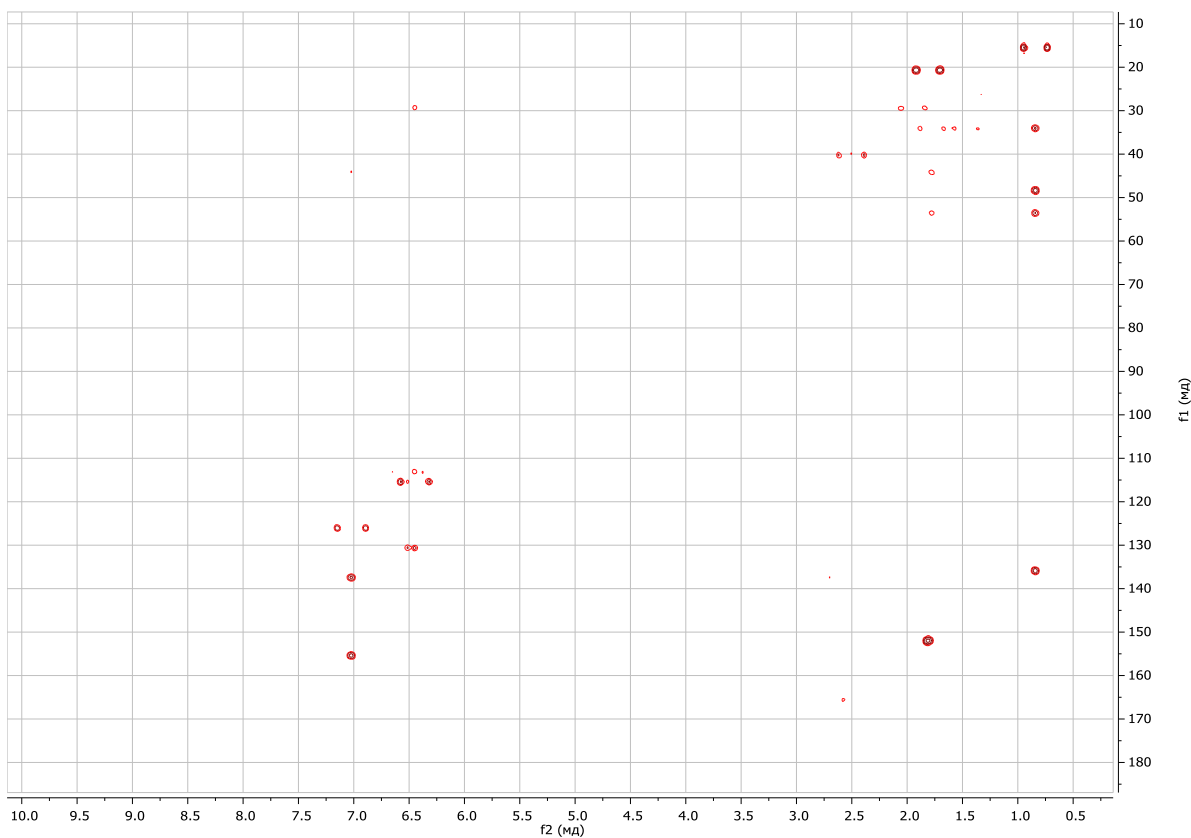

$^1\text{H}$ - $^1\text{H}$  COSY NMR (DMSO- $d_6$ ) spectrum of  
16-(4, 6-dimethyl-1,2-dihydro-1,3,5-triazin-2-yl)-17-chlor- $\Delta^{1,3,5(10),16}$ -estratetraen-3-ol (4a)

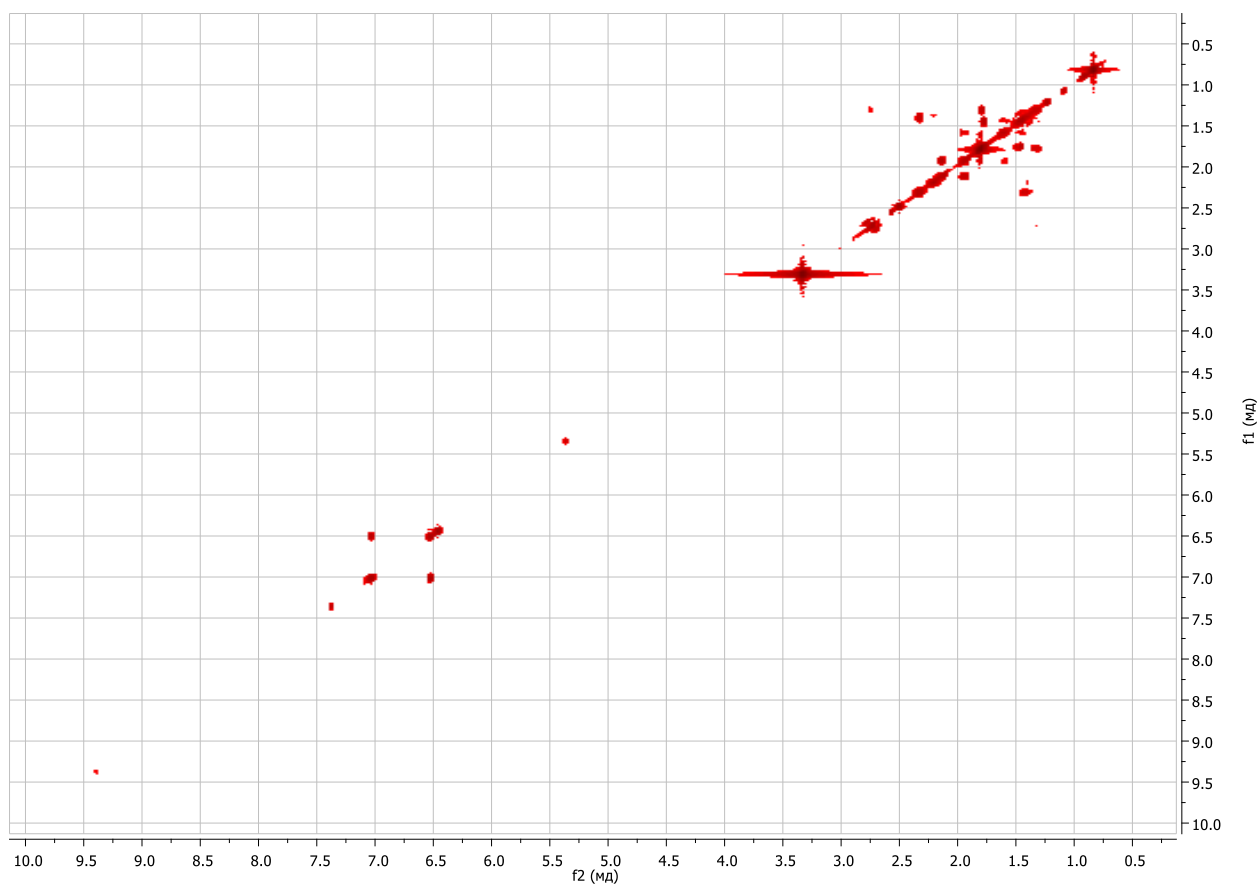

<sup>1</sup>H NMR (DMSO-d<sub>6</sub>, 600 MHz) spectrum of  
**3β-acetoxy-16-(4,6-dimethyl-1,2-dihydro-1,3,5-triazin-2-yl)-17-chlorandrosta-5,16-dien (4b)**

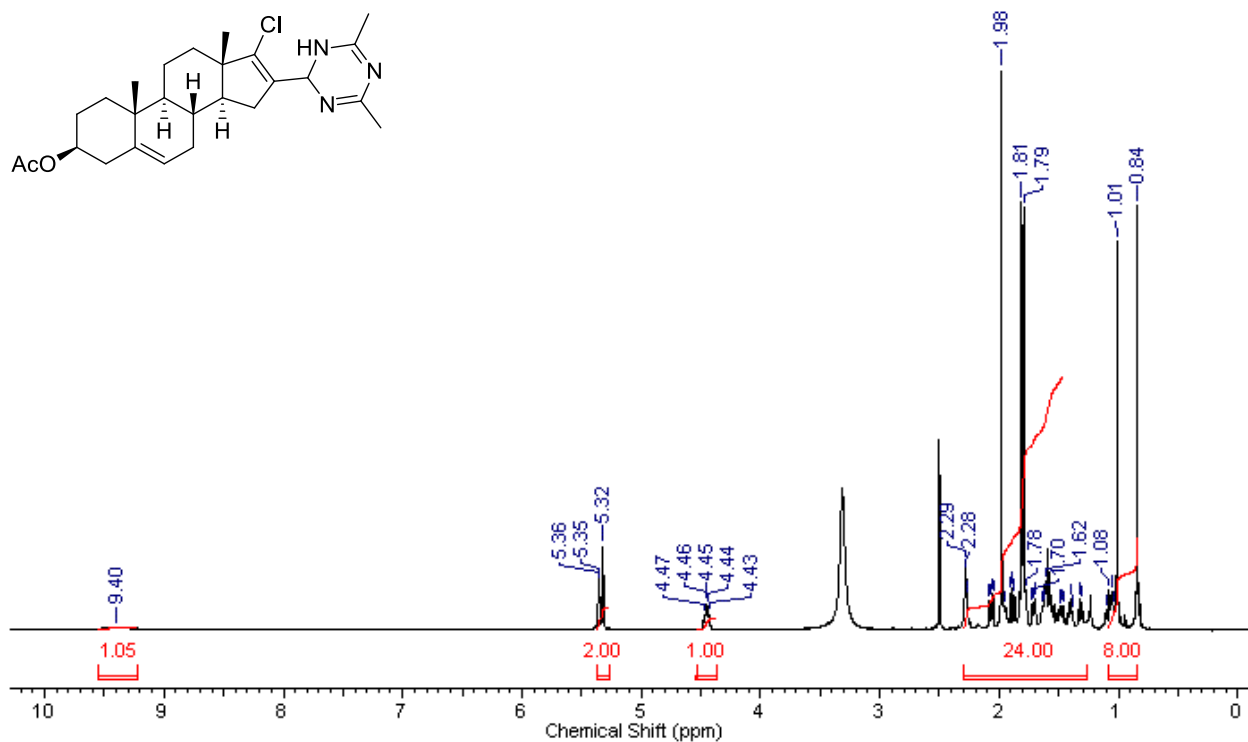

<sup>13</sup>C NMR (DMSO-d<sub>6</sub>, 150 MHz) spectrum of  
**3β-acetoxy-16-(4,6-dimethyl-1,2-dihydro-1,3,5-triazin-2-yl)-17-chlorandrosta-5,16-dien (4b)**

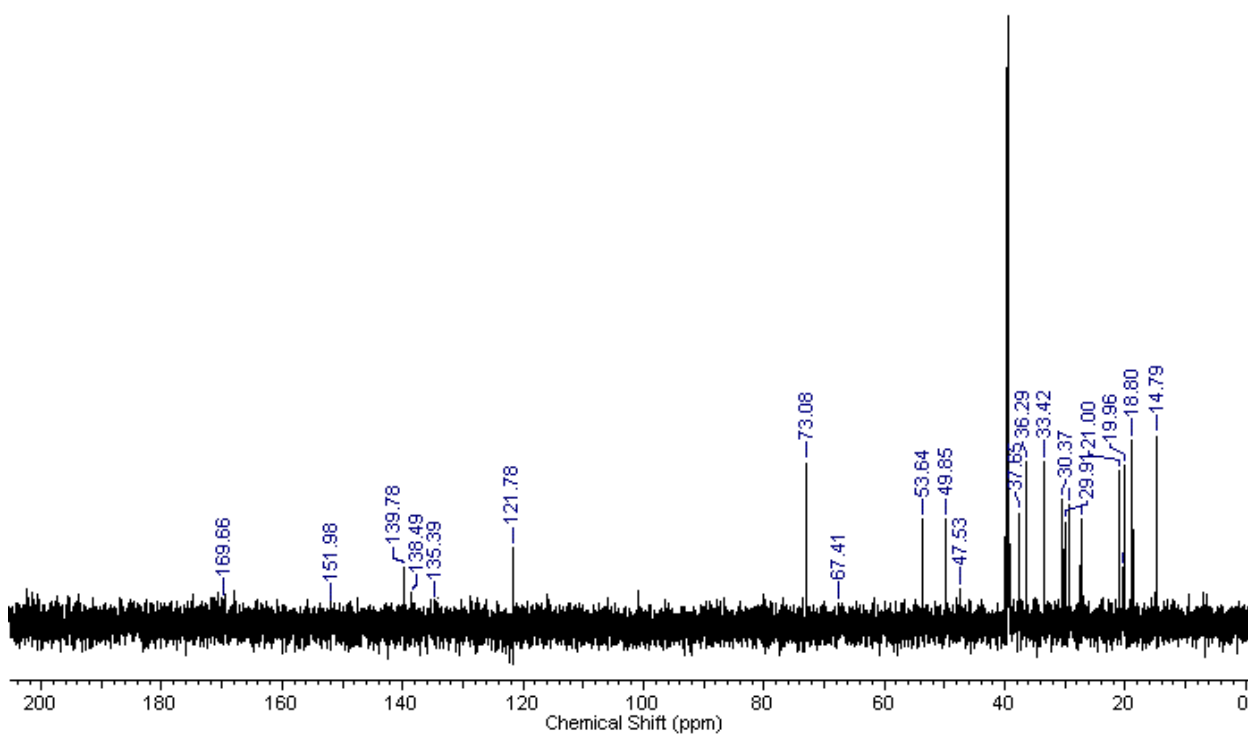

$^1\text{H}$ - $^{13}\text{C}$  HSQC NMR (DMSO- $d_6$ ) spectrum of  
**3 $\beta$ -acetoxy-16-(4,6-dimethyl-1,2-dihydro-1,3,5-triazin-2-yl)-17-chlorandrosta-5,16-dien (4b)**

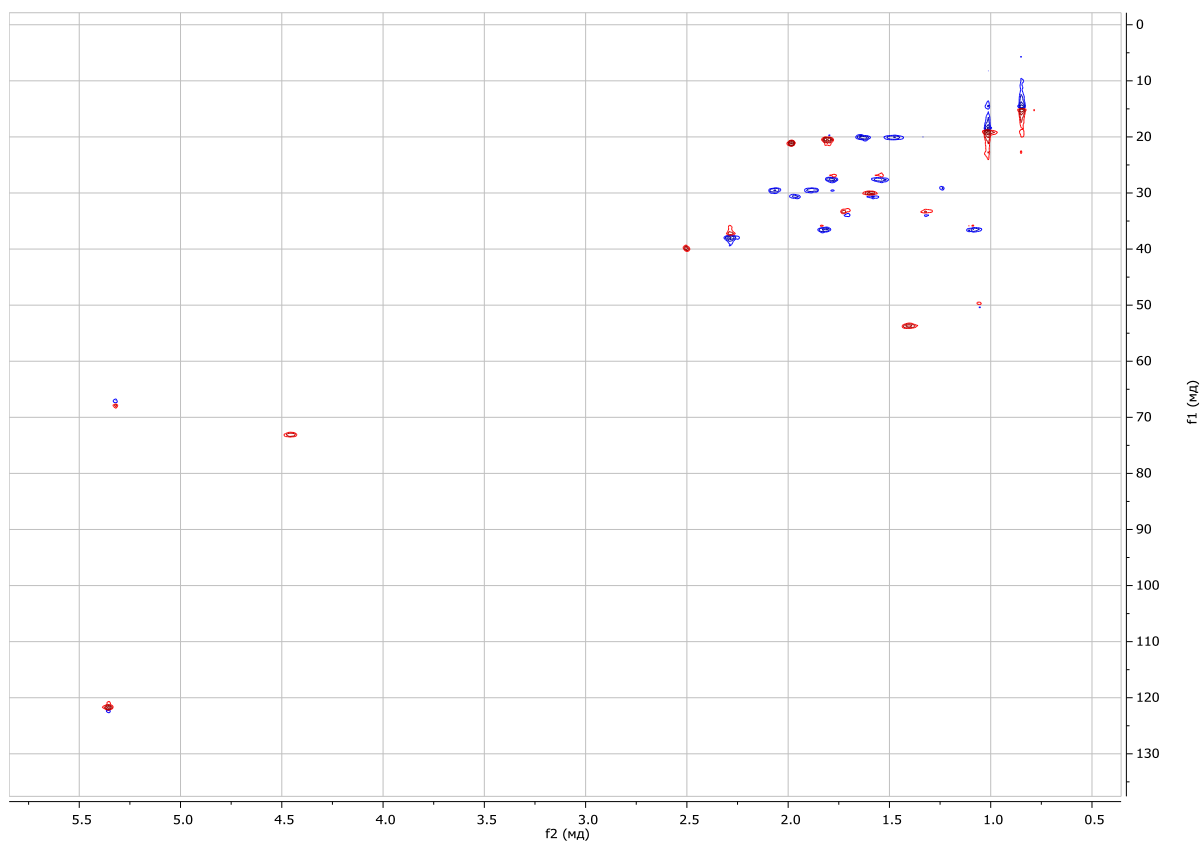

$^1\text{H}$ - $^{13}\text{C}$  HMBC NMR (DMSO- $d_6$ ) spectrum of  
**3 $\beta$ -acetoxy-16-(4,6-dimethyl-1,2-dihydro-1,3,5-triazin-2-yl)-17-chlorandrosta-5,16-dien (4b)**

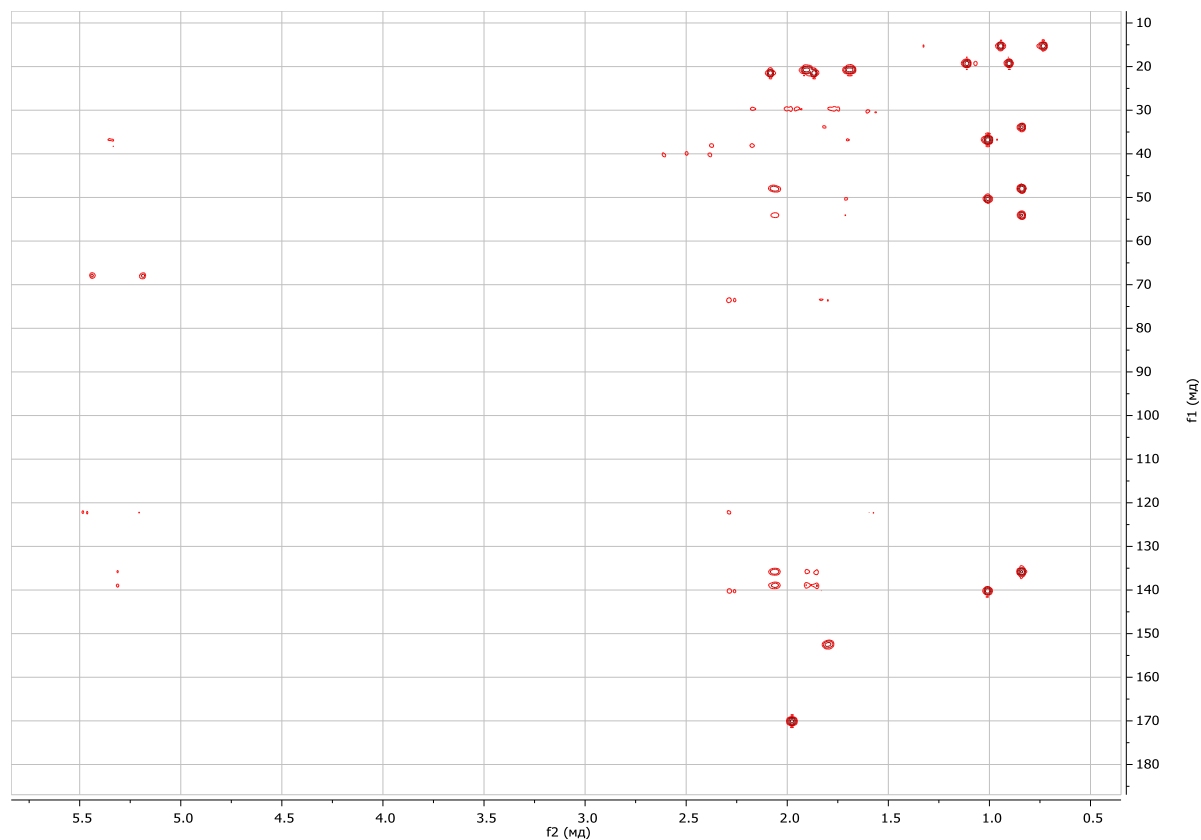

<sup>1</sup>H NMR (DMSO-d<sub>6</sub>, 600 MHz) spectrum of  
**17β-hydroxy-2-(4,6-dimethyl-1,2-dihydro-1,3,5-triazin-2-yl)-3-chlor-5α-androstane (4c)**

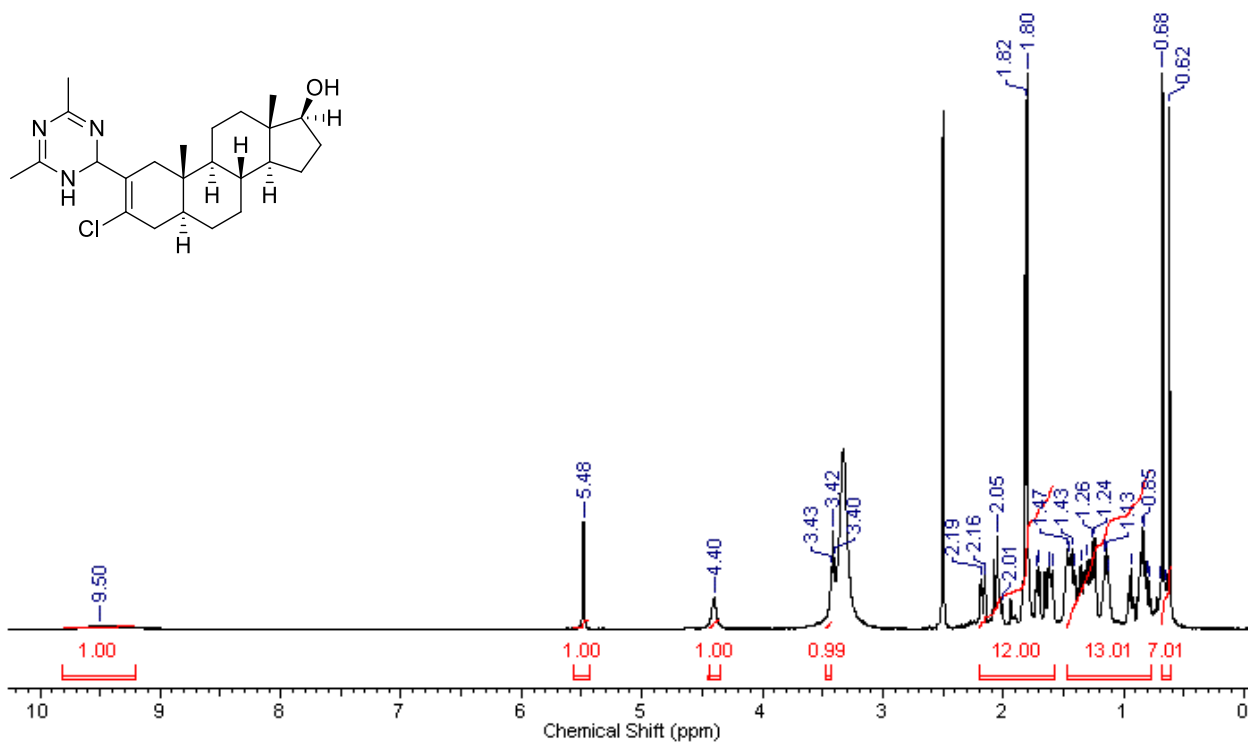

<sup>13</sup>C NMR (DMSO-d<sub>6</sub>, 150 MHz) spectrum of  
**17β-hydroxy-2-(4,6-dimethyl-1,2-dihydro-1,3,5-triazin-2-yl)-3-chlor-5α-androstane (4c)**

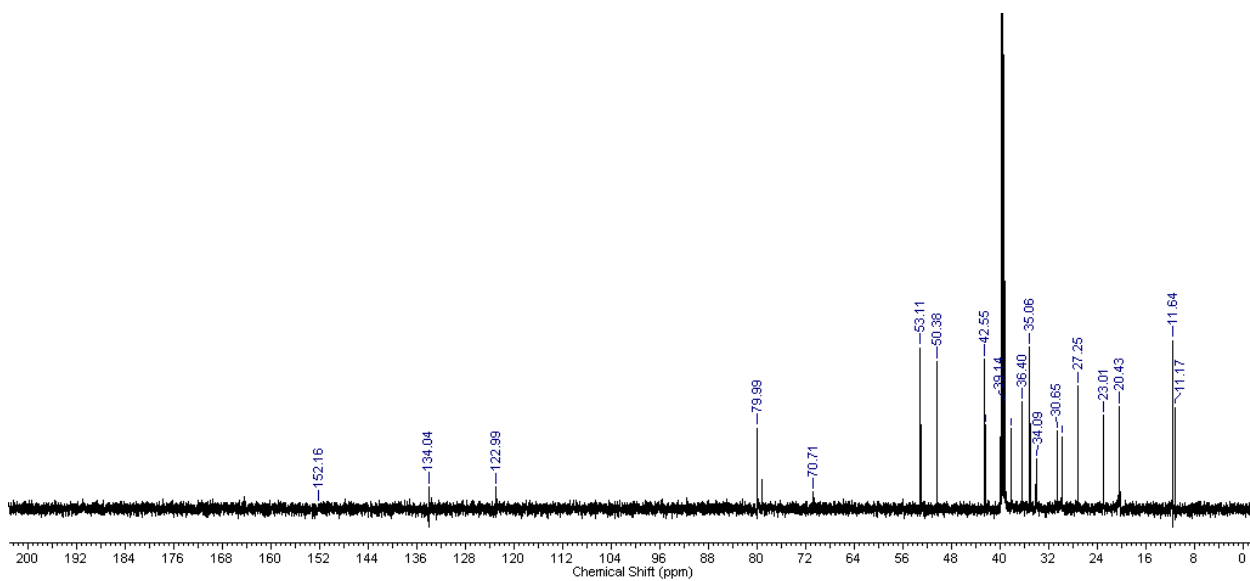



$^1\text{H}$ - $^{13}\text{C}$  HSQC NMR (DMSO- $d_6$ ) spectrum of  
**17 $\beta$ -hydroxy-2-(4,6-dimethyl-1,2-dihydro-1,3,5-triazin-2-yl)-3-chlor-5 $\alpha$ -androstane (4c)**

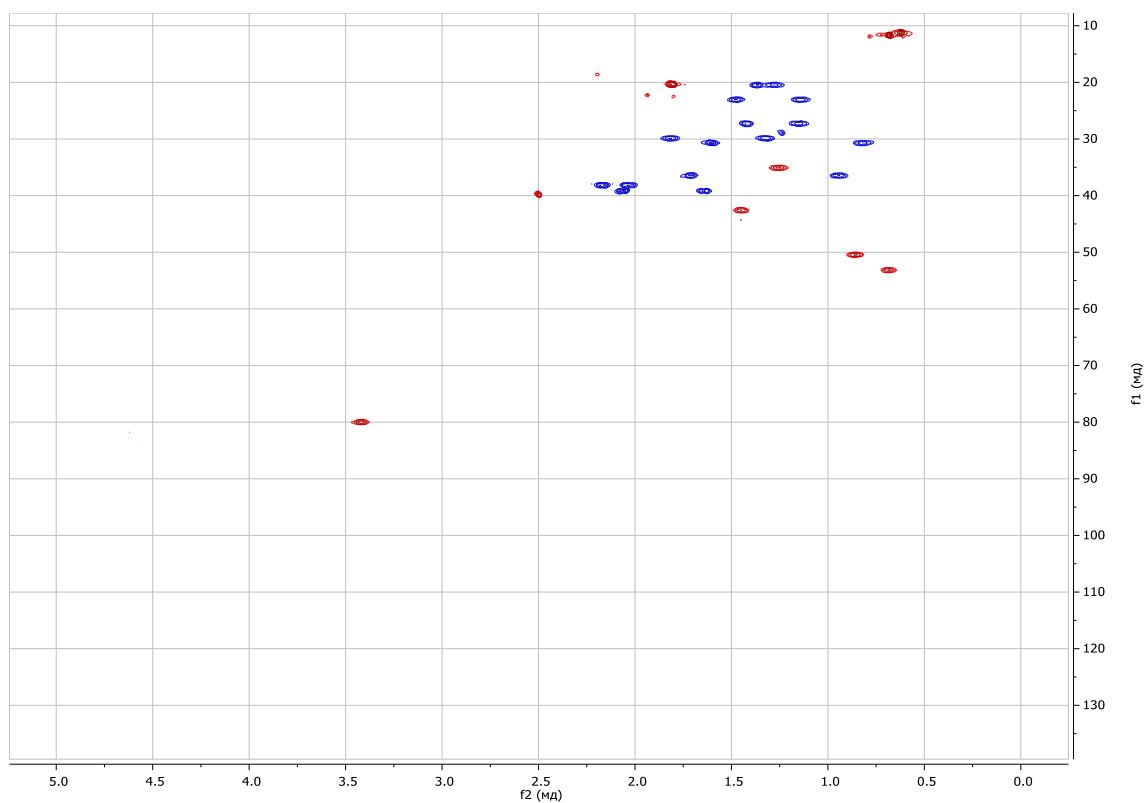

$^1\text{H}$ - $^{13}\text{C}$  HMBC NMR (DMSO- $d_6$ ) spectrum of  
**17 $\beta$ -hydroxy-2-(4,6-dimethyl-1,2-dihydro-1,3,5-triazin-2-yl)-3-chlor-5 $\alpha$ -androstane (4c)**

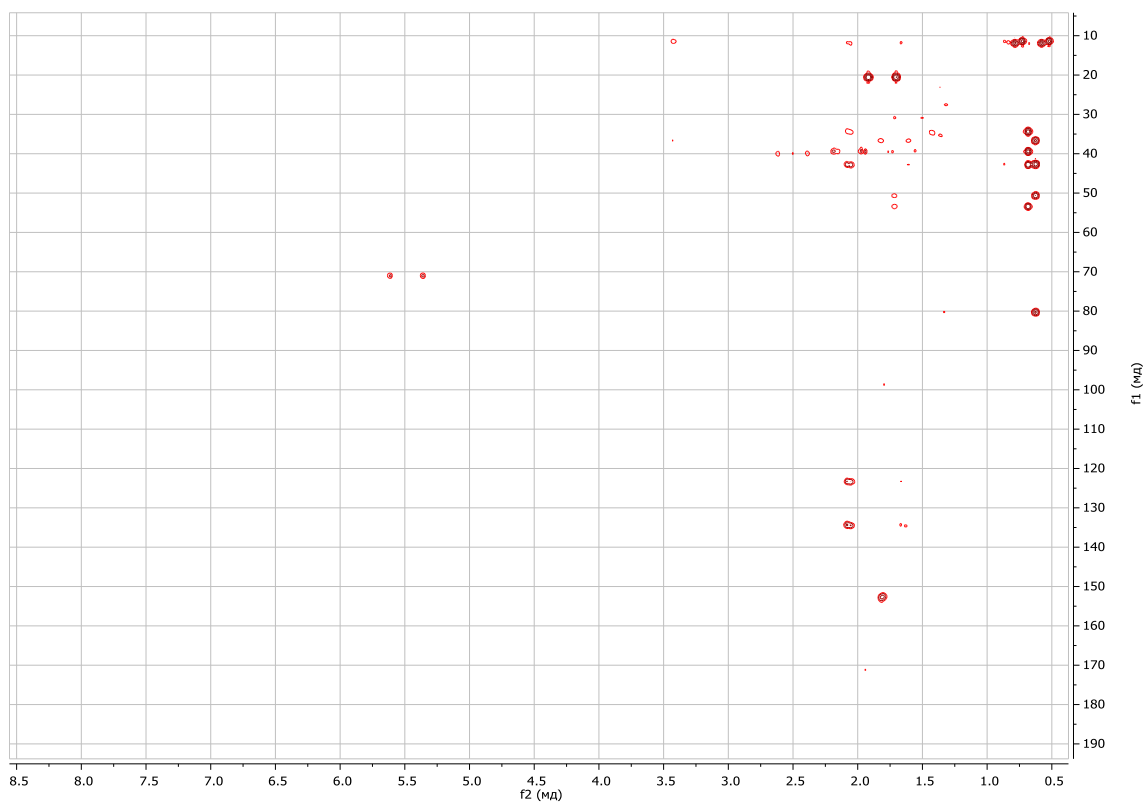

## Biology

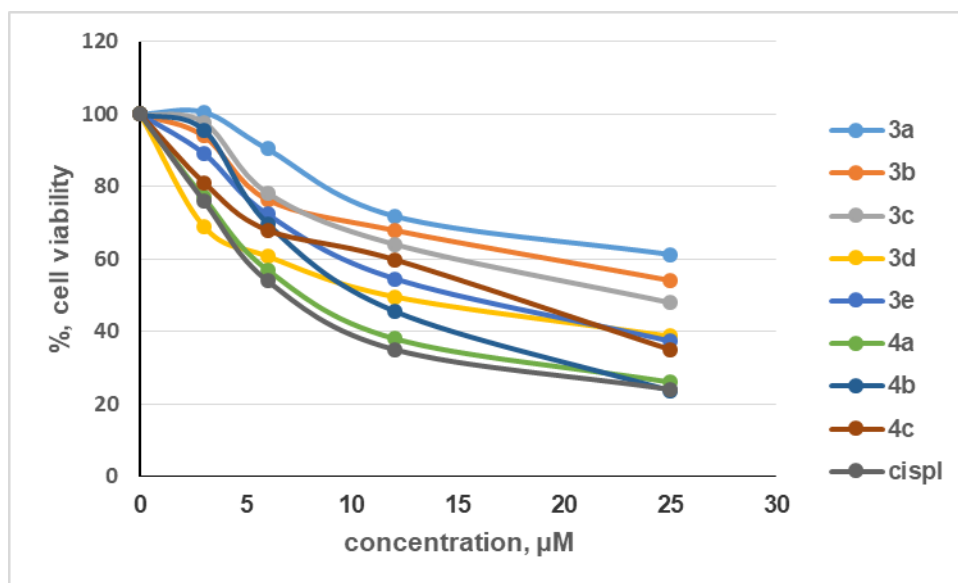

**Figure S1.** Antiproliferative activity of the synthesized heterosteroidal compounds and cisplatin against MCF-7 cells. Cisplatin (cispl) was used as reference drug. Cells were treated with compounds for 72 h and then the viability was assessed by MTT assay. Results were expressed as mean of 3 independent experiments.

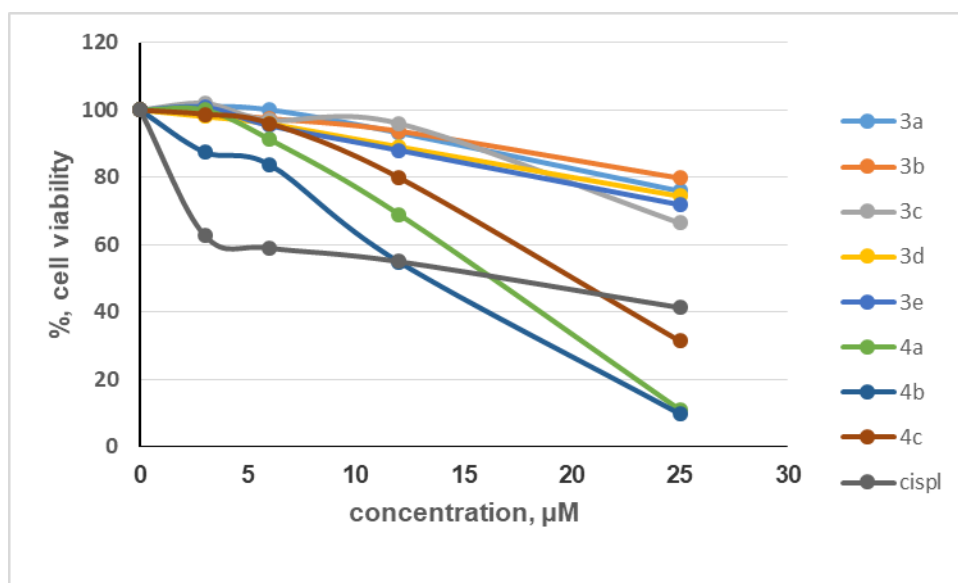

**Figure S2.** Antiproliferative activity of the synthesized heterosteroidal compounds and cisplatin against MDA-MB231 cells.

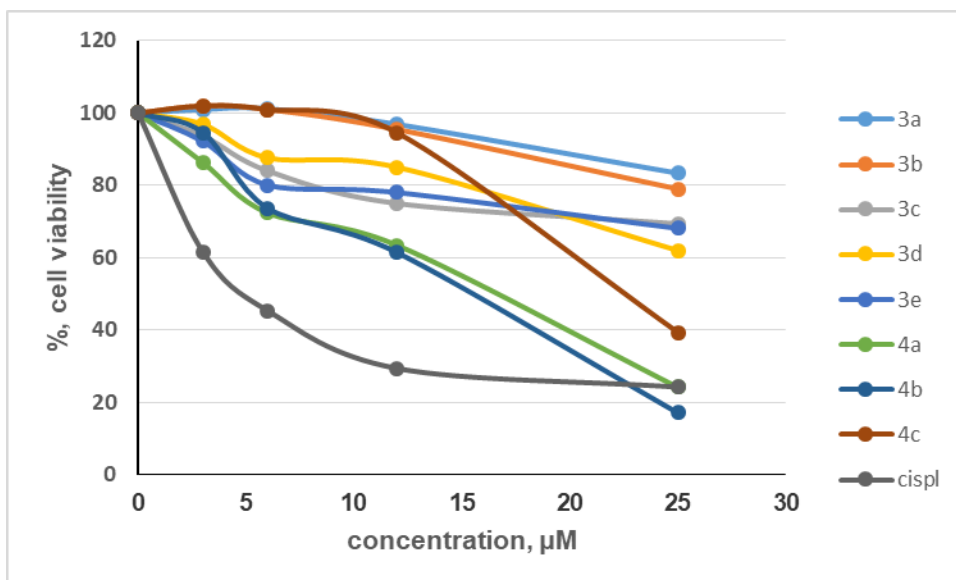

**Figure S3.** Antiproliferative activity of the synthesized heterosteroidal compounds and cisplatin against PC3 cells.

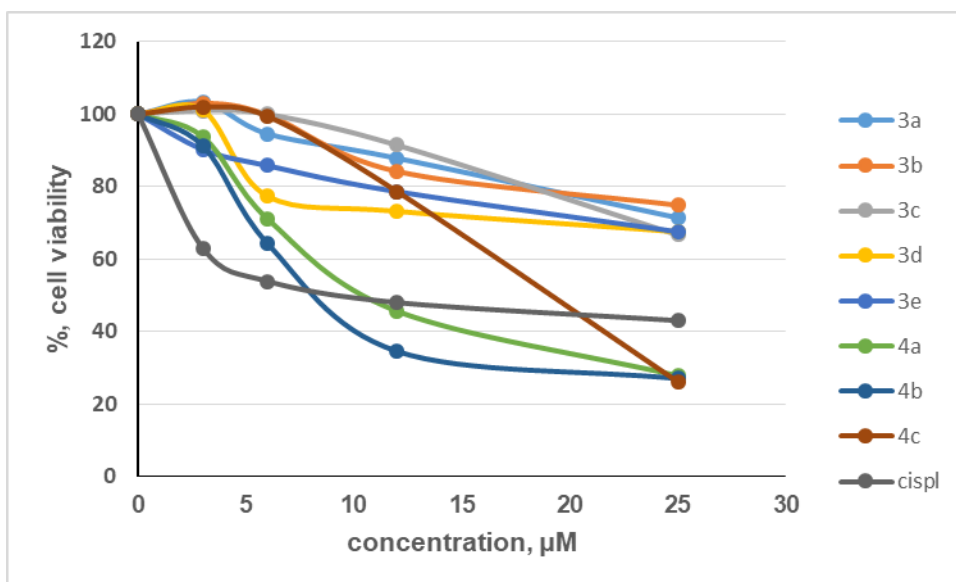

**Figure S4.** Antiproliferative activity of the synthesized heterosteroidal compounds and cisplatin against 22Rv1 cells.

**Table S1. Agonist effects of compounds on ERE-TK-luciferase activity in MCF-7 cells.** The transcriptional activation of reporter was assessed using Promega Luciferase assays. Cells were treated with compounds at 10 nM concentrations. 17β-estradiol (E2) was used as the reference ERα agonist. The results were expressed as the ratio of the firefly luciferase activity to the β-galactosidase activity, and the luciferase activity was relative to that of the cells treated with E2 which was set as 100.

| Entry       | Luciferase activity, rel. units |
|-------------|---------------------------------|
| <b>DMSO</b> | 2.0 ± 0.3                       |
| <b>3a</b>   | 6.9 ± 0.7                       |
| <b>3b</b>   | 11.4 ± 1.2                      |
| <b>3c</b>   | 2.1 ± 0.2                       |
| <b>3d</b>   | 2.0 ± 0.2                       |
| <b>3e</b>   | 2.1 ± 0.2                       |
| <b>4a</b>   | 2.2 ± 0.3                       |
| <b>4b</b>   | 2.0 ± 0.2                       |
| <b>4c</b>   | 1.9 ± 0.3                       |
| <b>E2</b>   | 100 ± 11                        |
